# Supplementary material
Source: Research Square preprint supplement (doi:10.21203/rs.3.rs-9342314/v1)
Supplement: Supplementary file 1 [file d8531ae6e7d93cf45a1b25a4.pdf]

## *Supplementary Information*

### **Wafer-Scale Synthesis of Metal-Oxide Nanonetworks for Ultra-Sensitive, Sub-Second Hydrogen Sensing Chips**

Jiyong Zhou<sup>1#</sup>, Sixing Xu<sup>1,2#\*</sup>, Hui Li<sup>1</sup>, Shunyang Zhou<sup>3</sup>, Tianliang Meng<sup>3</sup>, Siya Liu<sup>3</sup>, Xiaoting Tan<sup>3</sup>, Yuxuan Liang<sup>1</sup>, Mingquan Zhang<sup>3</sup>, Zhibiao Zhu<sup>3</sup>, Jianyou Dai<sup>3</sup>, Long Cheng<sup>3</sup>, Yiliu Wang<sup>3</sup>, Xiaohong Wang<sup>4</sup>, Wenbo Ding<sup>5</sup>, Changsheng Wu<sup>6</sup>, Wanli Duan<sup>7</sup>, Rui Li<sup>7</sup>, Shenghua Ding<sup>7</sup>, Qian Li<sup>8\*</sup>, Lei Liao<sup>1</sup>, Lei Shan<sup>3\*</sup>

<sup>1</sup>College of Semiconductors (College of Integrated Circuits), Hunan University, Changsha, China, 410082

<sup>2</sup>Yuelushan Center for Industrial Innovation, Changsha, China, 410082

<sup>3</sup>School of Physics & Electronics, Hunan University, Changsha, China, 410082

<sup>4</sup>School of Integrated Circuits, Tsinghua University, Beijing, China, 100084

<sup>5</sup>Shenzhen International Graduate School, Tsinghua University, Shenzhen, China, 518055

<sup>6</sup>Department of Material Science & Engineering, National University of Singapore, Singapore 117575

<sup>7</sup>Dongting Laboratory, Hunan Institute of Agricultural Product Processing and Quality Safety, Hunan Academy of Agricultural Sciences, Changsha, China, 410125

<sup>8</sup>School of Physics & Electronics, Hunan Normal University, Changsha, China, 410081

<sup>#</sup>These authors contribute equally.

Correspondence and requests for materials should be addressed to S. X., Q. L. & L. S. (email: xusx2021@hnu.edu.cn, liqianl@hunnu.edu.cn, leishan@hnu.edu.cn).

## **Table of contents**

|                                                   |       |
|---------------------------------------------------|-------|
| Supplementary Figures with Figure captions (1-43) | 1-46  |
| Supplementary tables (1-11)                       | 47-60 |
| Supplementary video                               | 61    |
| References                                        | 61-64 |

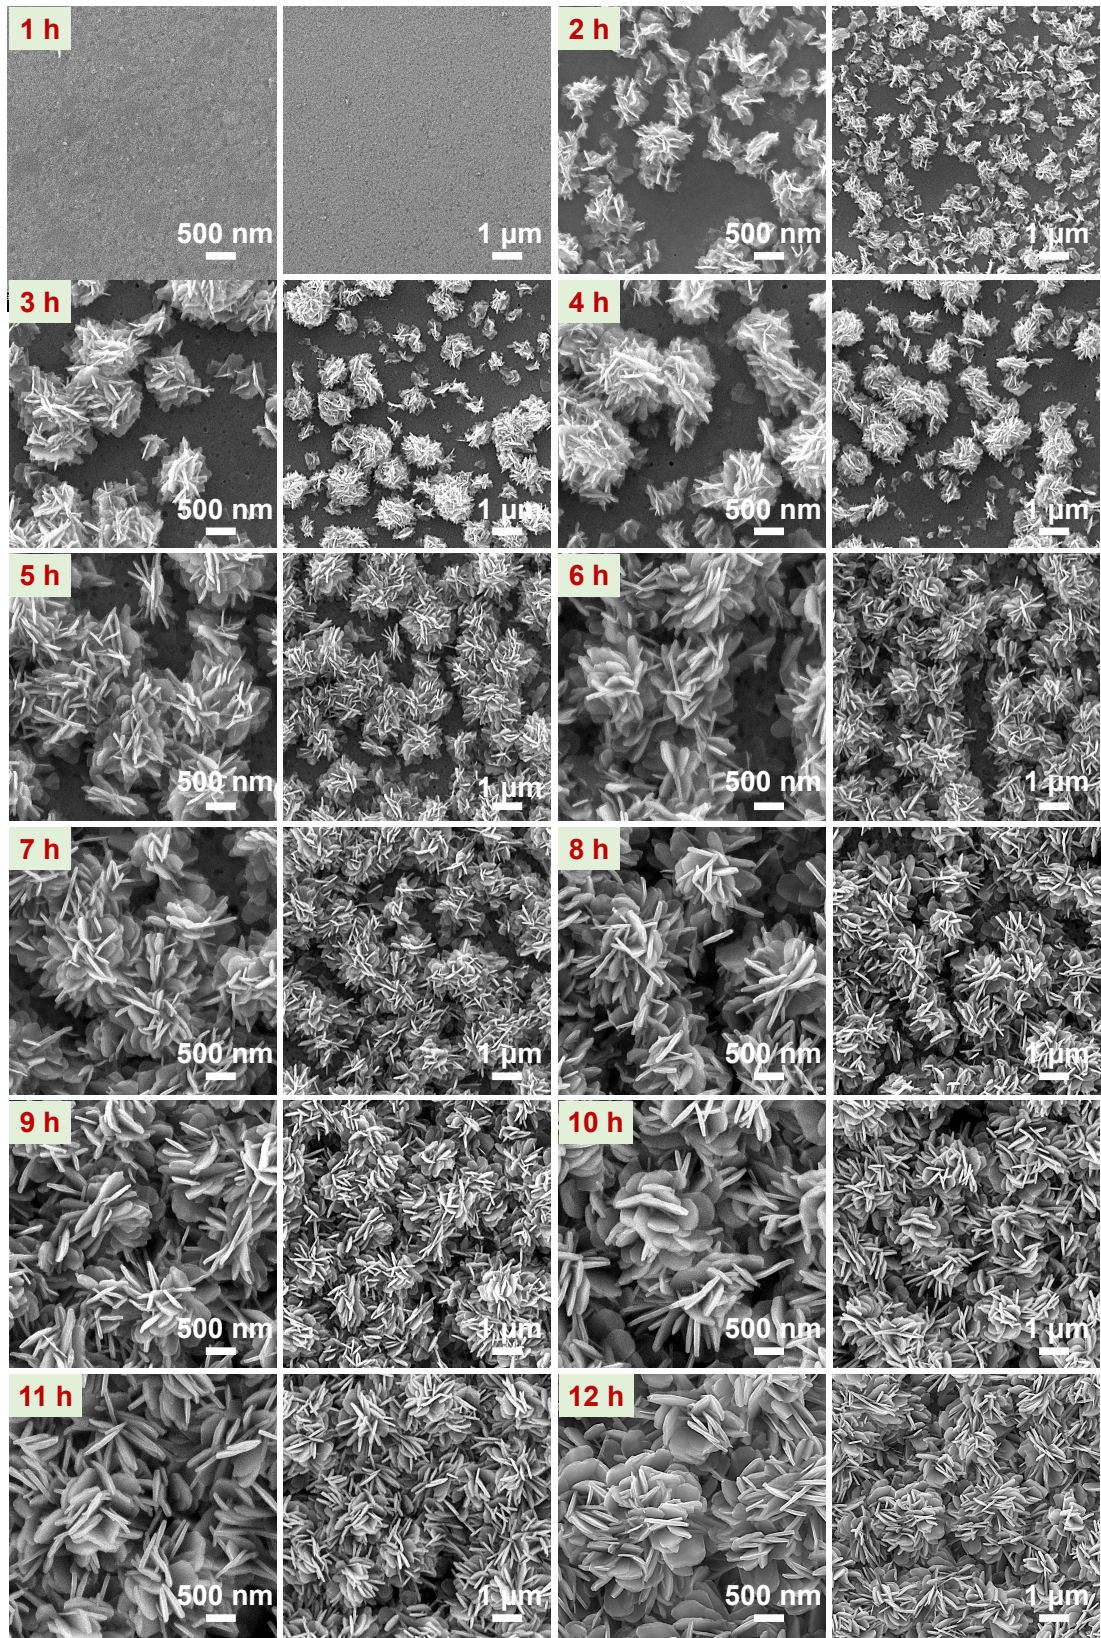

**Supplementary Figure 1** | SEM images of the surface structure of  $\text{WO}_3$  films changing with etching time.

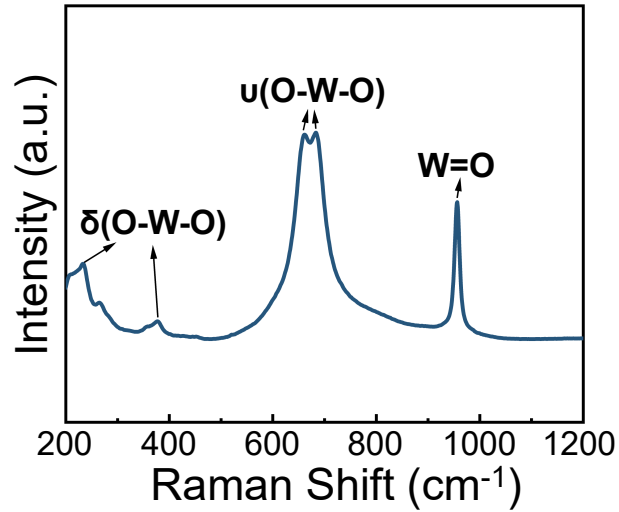

**Supplementary Figure 2** | Raman spectrum of  $\text{WO}_3 \cdot 2\text{H}_2\text{O}$ .

As shown in the figure, the Raman spectrum of the sample exhibits a pronounced and sharp peak at  $956 \text{ cm}^{-1}$ , which can be attributed to the stretching vibration of the terminal  $\text{W=O}$  double bond. The doublet peaks observed at  $661 \text{ cm}^{-1}$  and  $683 \text{ cm}^{-1}$  correspond to the stretching vibrations of  $\text{W-O-W}$  bridging bonds, characteristic of the connectivity within  $\text{WO}_6$  octahedra, indicating an intact octahedral framework in the sample. In the low wavenumber region, additional characteristic peaks at  $377 \text{ cm}^{-1}$  and  $233 \text{ cm}^{-1}$  are assigned to the bending modes of  $\text{O-W-O}$  linkages, further suggesting good crystallinity and a stable crystal structure. These observed vibrational modes are consistent with the expected molecular configuration and bonding interactions within the  $\text{WO}_3 \cdot 2\text{H}_2\text{O}$  structure<sup>1,2</sup>.

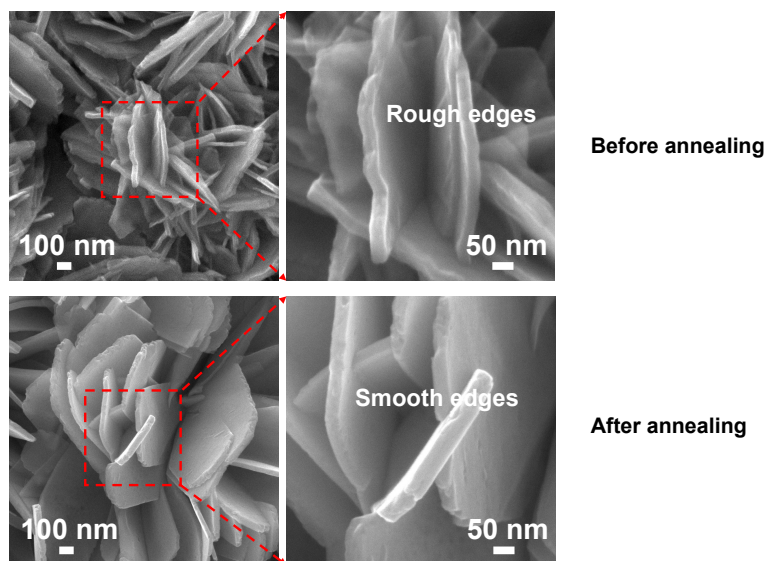

**Supplementary Figure 3** | SEM images of the morphology of  $\text{WO}_3$  nanosheets before and after annealing.

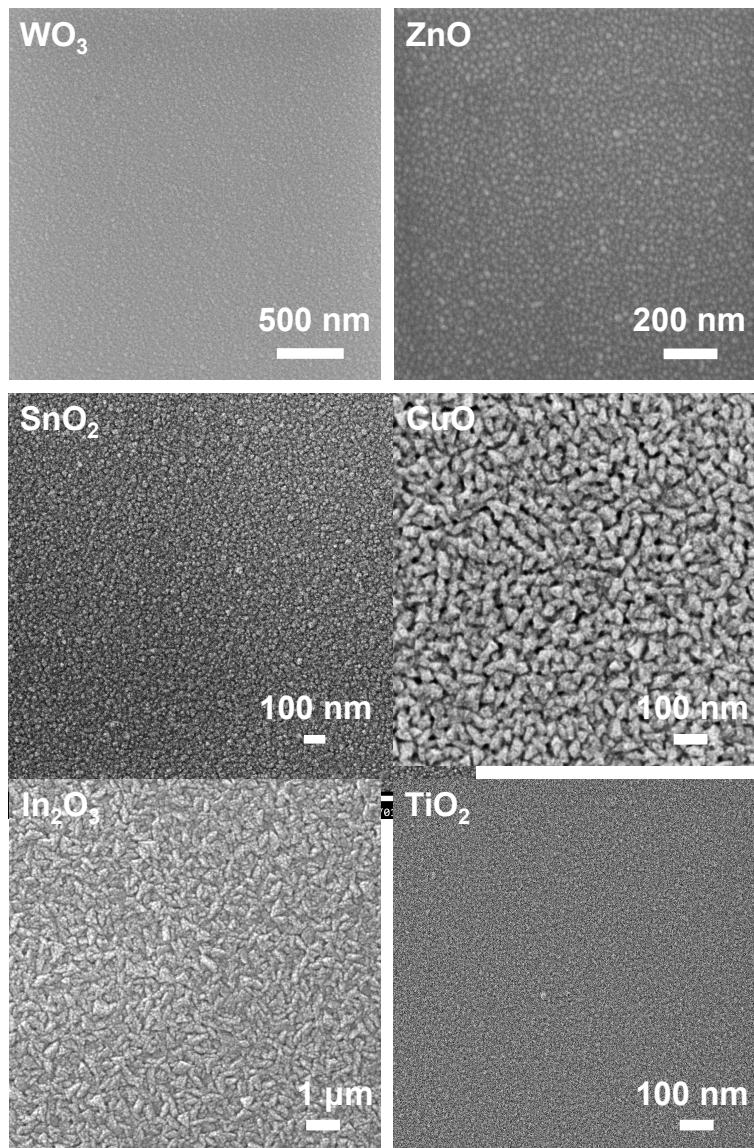

**Supplementary Figure 4** | SEM images of the morphology of various samples before etching.

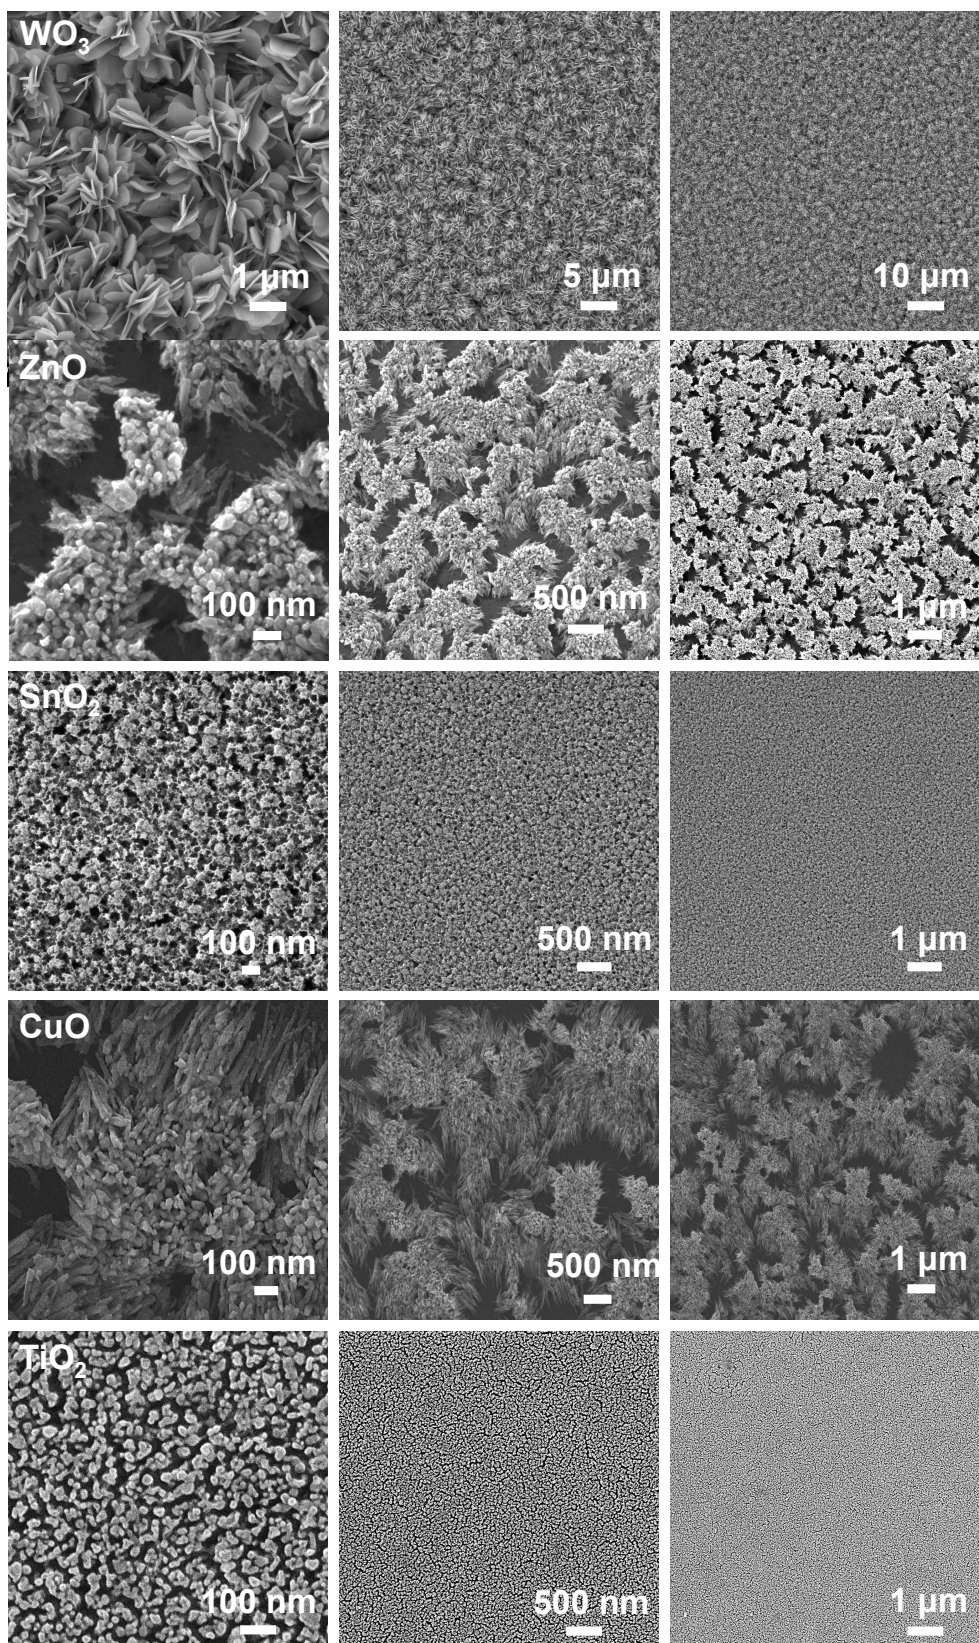

**Supplementary Figure 5** | SEM images of the morphology (other scales) of various samples after etching.

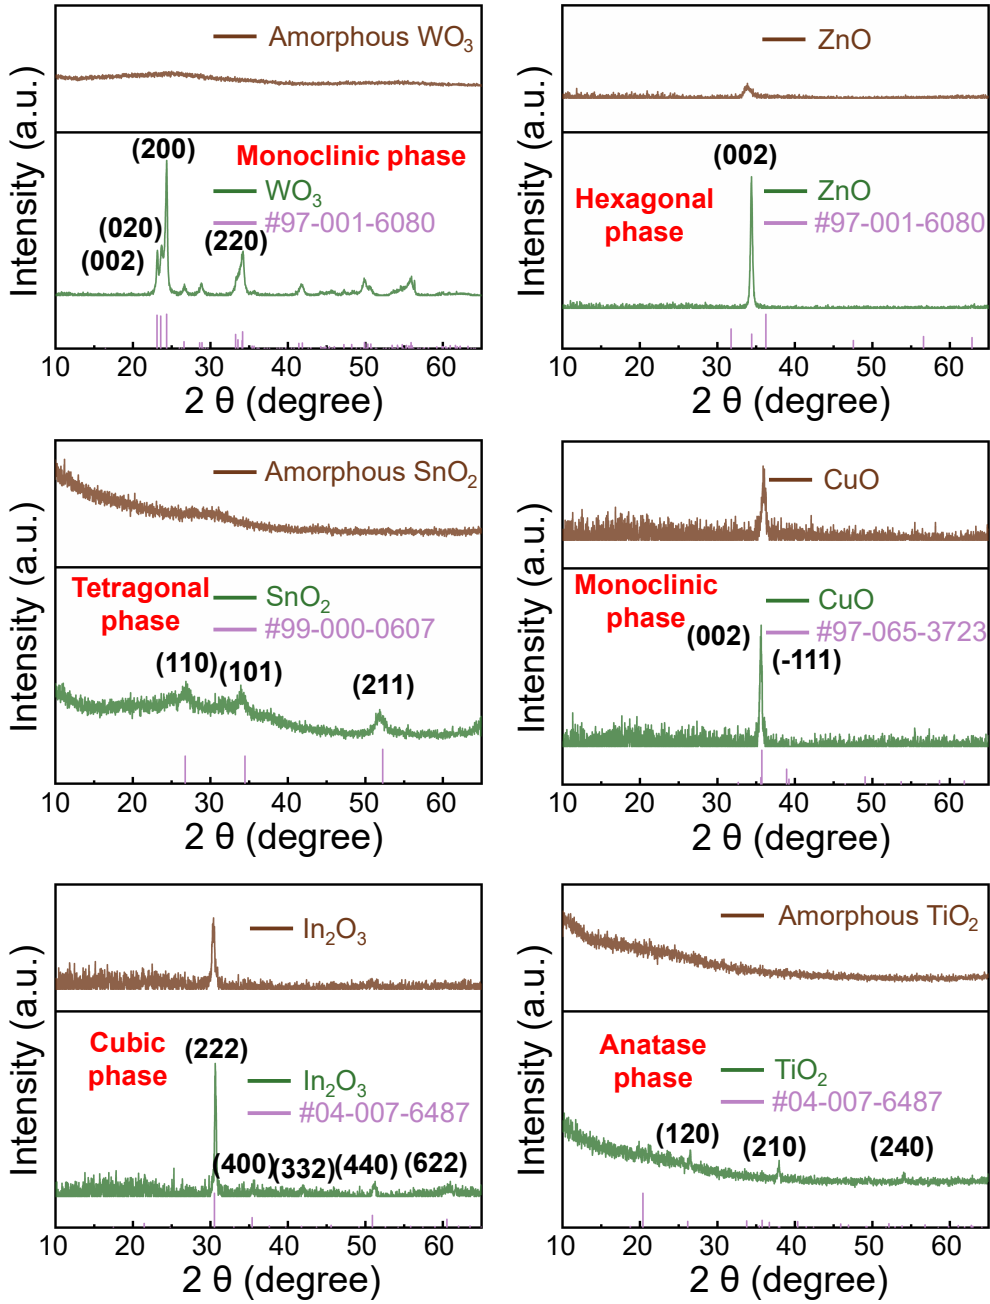

Supplementary Figure 6 | XRD patterns of various samples after sputtering or annealing.

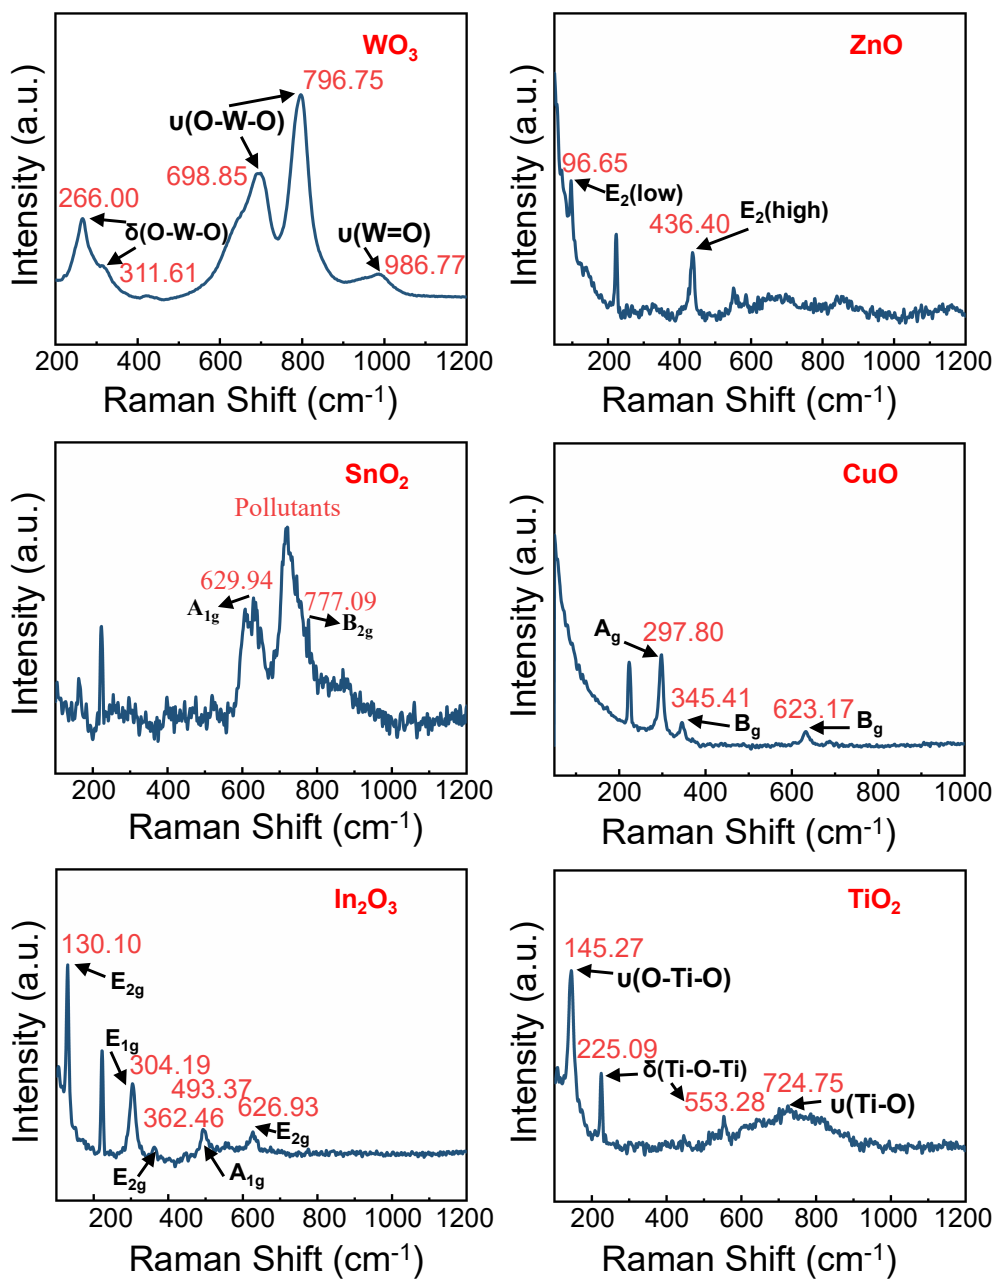

Supplementary Figure 7 | Raman spectra of various samples after annealing.

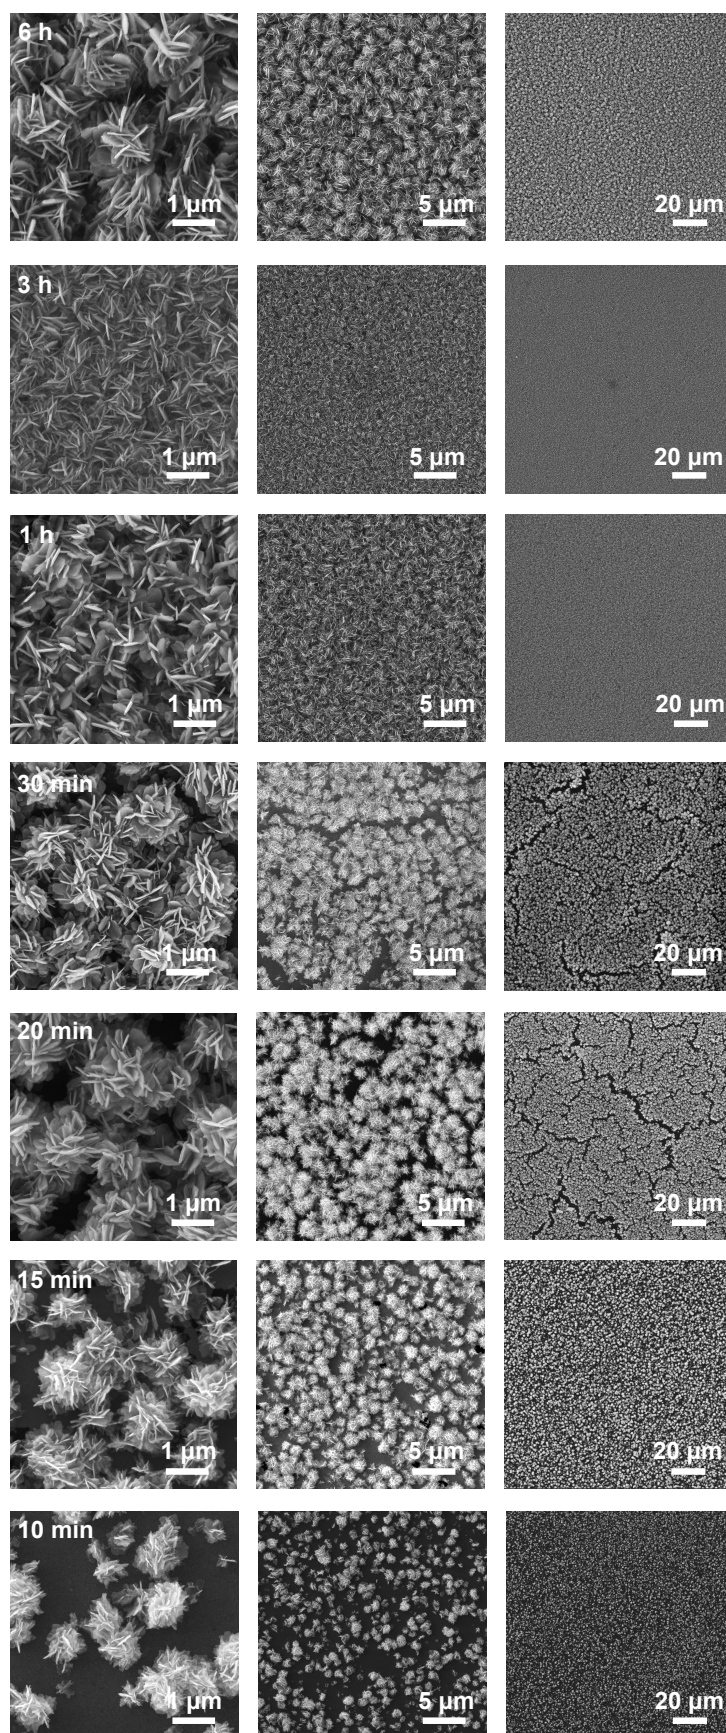

**Supplementary Figure 8** | Nanomorphology after etching corresponding to different sputtering times.

By varying only the sputtering duration (i.e., the deposited  $\text{WO}_3$  loading; 6 h, 3 h, 1 h, 30 min, 20 min, 15 min, and 10 min), we obtained a series of post-etch morphologies. As the deposition time decreases, the etched films become progressively more sparse. At 15 min, nearly all nanospheres assembled from  $\text{WO}_3$  nanosheets are discrete and well isolated, and their areal number density is not lower than that of the 10-min sample. The 15-min specimen therefore yields a nanostructured sensing layer with pronounced gas-transport pathways, in which the constituent nanosheets are almost fully exposed to the ambient, providing the structural basis for subsequent high-performance hydrogen sensing.

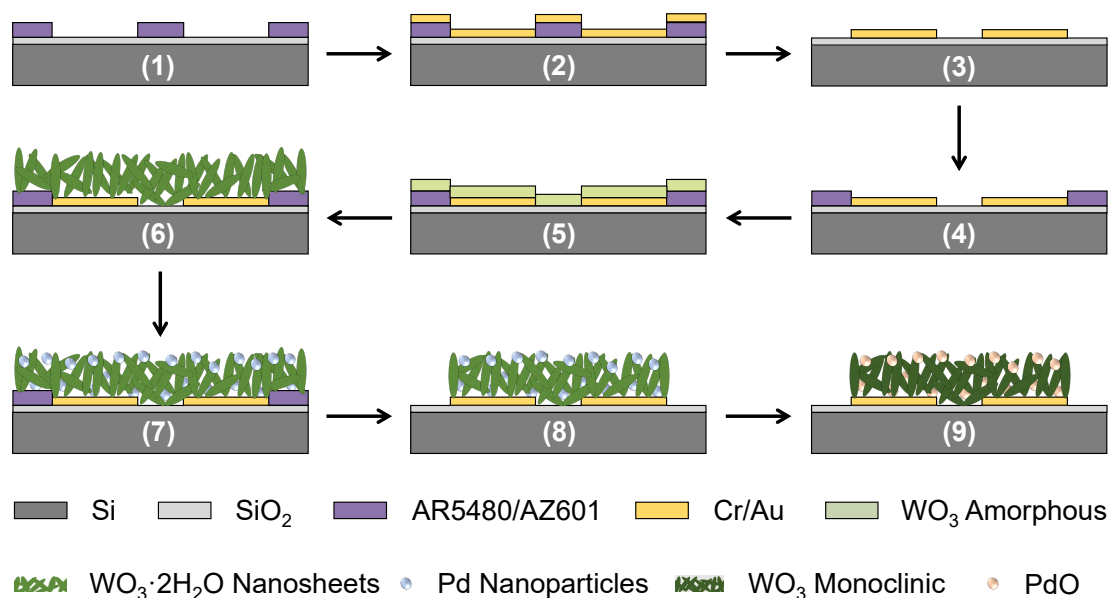

**Supplementary Figure 9** | Illustration of the entire microfabrication process of PdO/WO<sub>3</sub> sensors.

#### Detailed fabrication steps:

(1) Use the 4-inch Si (500 μm)/SiO<sub>2</sub> (300 nm) wafer as the substrate. Pattern the wafer substrate with the photoresist (AR5480/AZ601, 2000/3000 rpm, 150 °C, 3 min/100 °C, 2min) and Mask No.1 using ultraviolet photolithography machine (EVG 610, 200 mJ/cm<sup>2</sup>) to define the region of interdigitated electrodes (150 μm width, 50 μm electrode gap).

(2) Deposit Cr (10 nm)/Au (40 nm) as the adhesive layer and current collector of sensors using the Vacuum evaporation.

(3) Immerse the wafer in the acetone for 10 minutes to lift off the photoresist/Cr/Au to form the interdigitated electrodes of sensors.

(4) Defined the sensing layer region (1.3 mm length, 0.75 mm width) with Mask No. 2 UV and photoresist (same as above) using the ultraviolet photolithography (EVG 610, 200 mJ/cm<sup>2</sup>).

(5) Magnetron sputtering WO<sub>3</sub> (Bound with copper back target, DC 60 W) for 15 minutes to create sensing layer of sensors without heating the substrate.

(6) Immerse the wafer in the hydrochloric acid HCl (0.5 mol/L) for chemical etching for 12 h, and the dense WO<sub>3</sub> sensing layer slowly formed a nanosheet structure.

(7) Conventional magnetron sputtering of Pd (DC 40 W) decorates Pd nanoparticles onto the nanosheets without heating the substrate.

(8) Immerse the wafer in the acetone for 10 minutes to lift off the photoresist/Pd-WO<sub>3</sub> to finish the pattern of sensing layer.

(9) The wafer was annealed at 400 °C in air for 2 h.

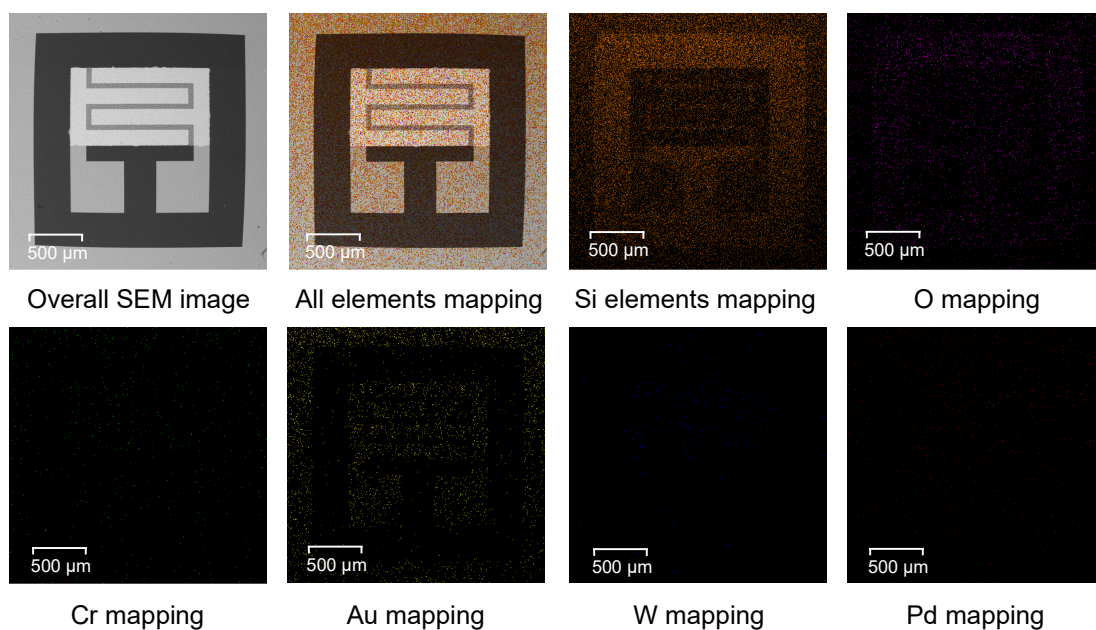

**Supplementary Figure 10** | EDS elemental mapping of a single sensor device.

It shows that all constituent elements appear from bottom to top in the sequence prescribed by the fabrication stack. W and Pd are primarily localized on the test electrodes, consistent with the device design, indicating that the PdO/WO<sub>3</sub> nanosheet array is indeed formed within the boundary region of the electrodes. The Cr and Pd maps are relatively faint, mainly due to their low loading and the large field of view used for imaging.

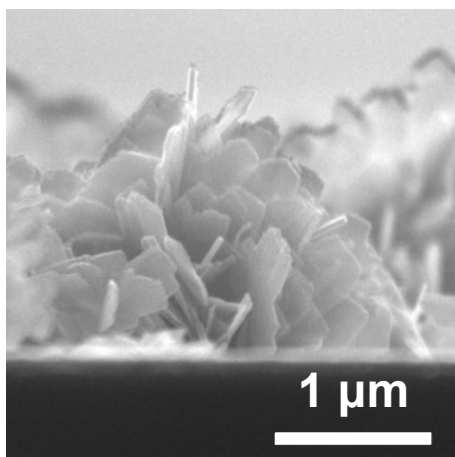

**Supplementary Figure 11** | The cross-section images of the PdO/WO<sub>3</sub>-20s sensor.

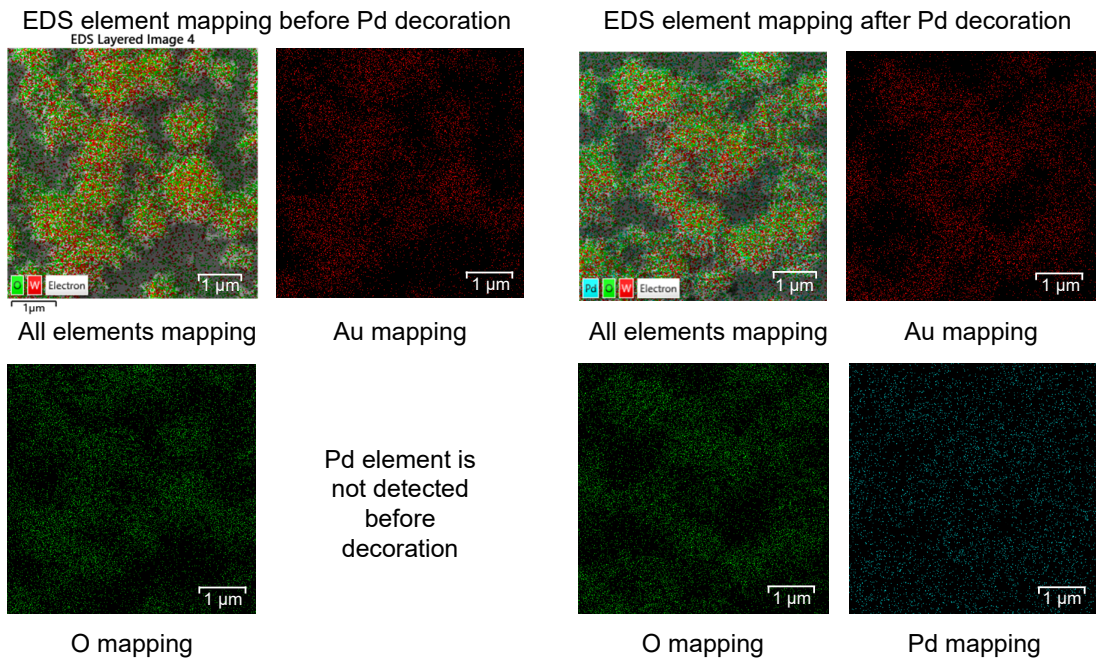

**Supplementary Figure 12** | EDS element mapping images of the  $\text{WO}_3$  NSs before Pd decoration (Left) and after Pd decoration (Right).

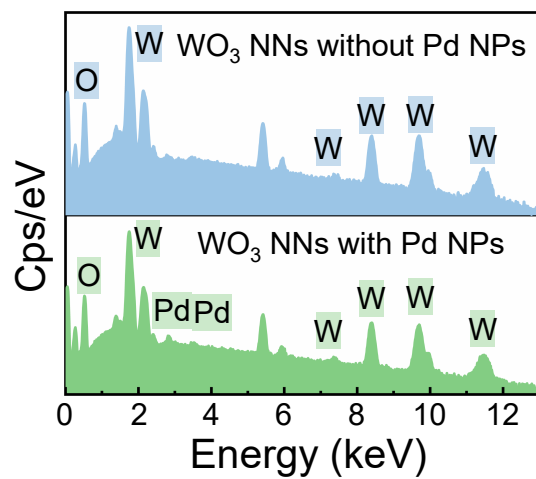

**Supplementary Figure 13** | EDS spectrum of the WO<sub>3</sub> NSs before Pd decoration and after Pd decoration.

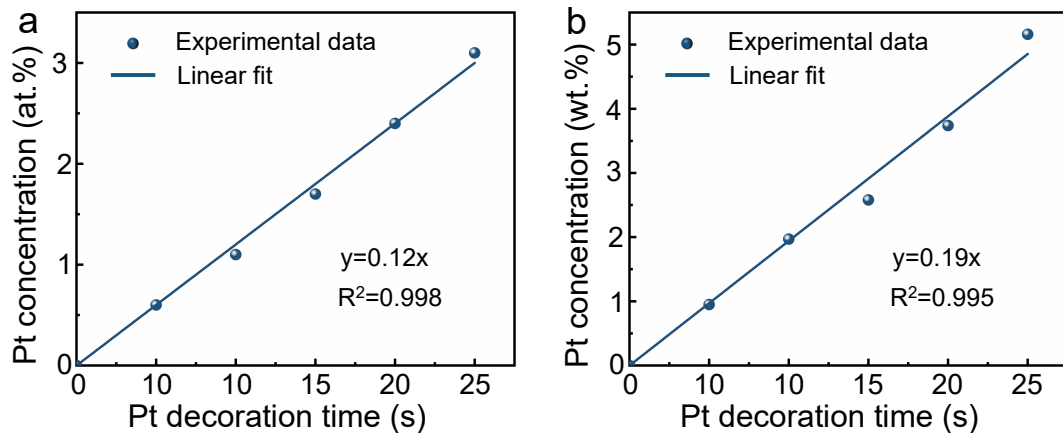

**Supplementary Figure 14** | Calculated atom percentage (a) and normalized weight percentage (b) of Pd from EDS data as a function of Pd decoration time.

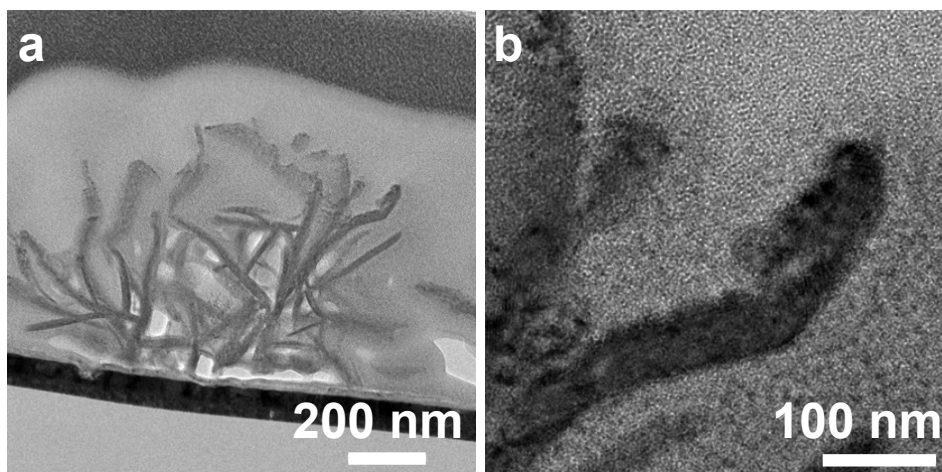

**Supplementary Figure 15** | a Overall and b TEM images of PdO/WO<sub>3</sub> nanosheets (the Pt layer on top of the layer stack are part of the FIB lamella preparation).

The TEM images in Supplementary Fig. 15 (prepared by FIB slicing) further provide direct information about the PdO/WO<sub>3</sub> nanosheet structure. Supplementary Fig. 15a shows that the individual nanosheet structures composing the nanosheets grow divergently from the substrate surface, forming a high-aspect-ratio sheet-like aggregate. The higher magnification TEM image (Supplementary Fig. 15b) highlights the localized contrast enhancement features of individual nanosheet fragments, with dense dark regions visible along the edges of the sheets, indicating that PdO is attached to the surface of the WO<sub>3</sub> sheets. In the Pd/WO<sub>3</sub> composite material, Pd is typically dispersed in the form of PdO NSs under air annealing conditions, and this dispersion characteristic is consistent with previously reported PdO/WO<sub>3</sub> systems.

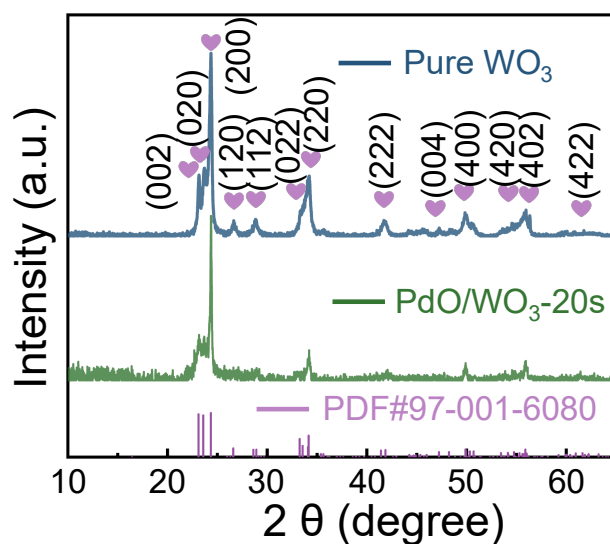

**Supplementary Figure 16** | XRD patterns of  $\text{WO}_3$  and  $\text{PdO}/\text{WO}_3$ -20s nanosheets.

All peaks can be indexed to monoclinic  $\text{WO}_3$  (PDF#97-001-6080). No discernible diffraction peaks associated with Pd or PdO are observed, and the main  $\text{WO}_3$  reflections exhibit no obvious peak shift, indicating that at the Pd loading level used in this work, Pd is present predominantly as highly dispersed, low-content oxide species on the surface rather than being incorporated into the  $\text{WO}_3$  lattice<sup>3</sup>.

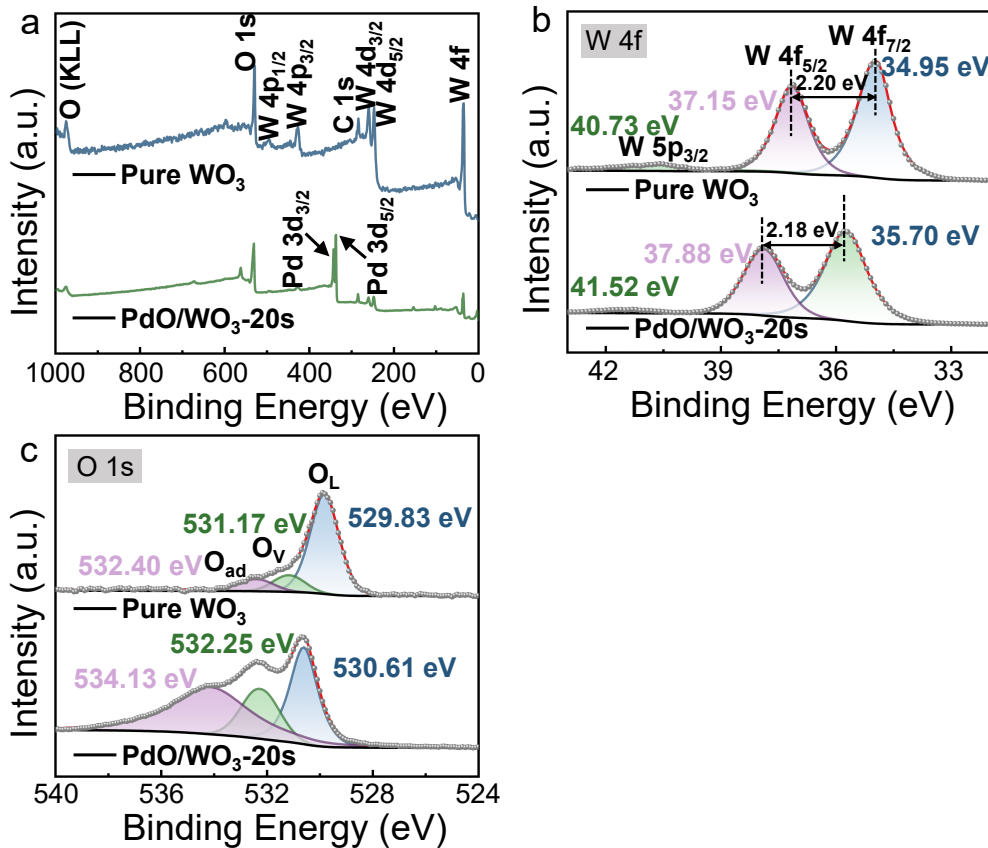

**Supplementary Figure 17** | XPS spectra of the  $\text{WO}_3$  and  $\text{PdO}/\text{WO}_3\text{-20s}$  nanosheets: a Full spectra, b W 4f and c O 1s.

Compared with pristine  $\text{WO}_3$  films, the survey spectrum of  $\text{PdO}/\text{WO}_3\text{-20s}$  shows a pronounced Pd 3d feature, confirming the coexistence of W, O and Pd in the sample (Supplementary Fig. 17a). As shown in Supplementary Fig. 17b, the W 4f<sub>7/2</sub> and W 4f<sub>5/2</sub> peaks of pristine  $\text{WO}_3$  are located at 34.95 eV and 37.15 eV, respectively, whereas in  $\text{PdO}/\text{WO}_3\text{-20s}$  they shift to higher binding energies of 35.70 eV and 37.88 eV. The spin–orbit splitting remains  $\sim 2.2$  eV, consistent with a  $\text{W}^{6+}$ -dominated valence state. The overall positive shift in binding energy indicates that Pd incorporation slightly decreases the electron density around W through interfacial charge transfer and surface catalytic oxidation effects<sup>4</sup>. The O 1s spectrum (Supplementary Fig. 17c) can be deconvoluted into three components: lattice oxygen ( $\text{O}_L$ ) (pristine  $\text{WO}_3$ : 529.83 eV;  $\text{PdO}/\text{WO}_3\text{-20s}$ : 530.61 eV), oxygen-vacancy-related oxygen ( $\text{O}_V$ ) (531.17  $\rightarrow$  532.25 eV), and adsorbed oxygen ( $\text{O}_{ad}$ ) (532.40  $\rightarrow$  534.13 eV). Notably, the area fractions of the high-binding-energy components ( $\text{O}_V$  and  $\text{O}_{ad}$ ) increase markedly in  $\text{PdO}/\text{WO}_3\text{-20s}$  (Supplementary Table 3), indicating that Pd modification substantially enriches surface defect oxygen and chemisorbed oxygen species. Extensive studies have shown that these reactive oxygen species serve as key sites for charge exchange with target gases such as  $\text{H}_2$  in metal-oxide gas-sensing reactions, and can amplify the resistance change by modulating the surface depletion layer thickness<sup>5,6</sup>.

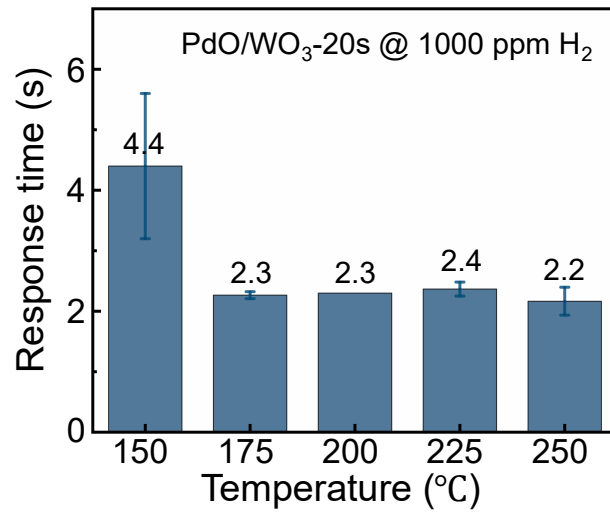

**Supplementary Figure 18** | Relationship between response time and operating temperature for the PdO/WO<sub>3</sub>-20s sensor to 1000 ppm H<sub>2</sub>.

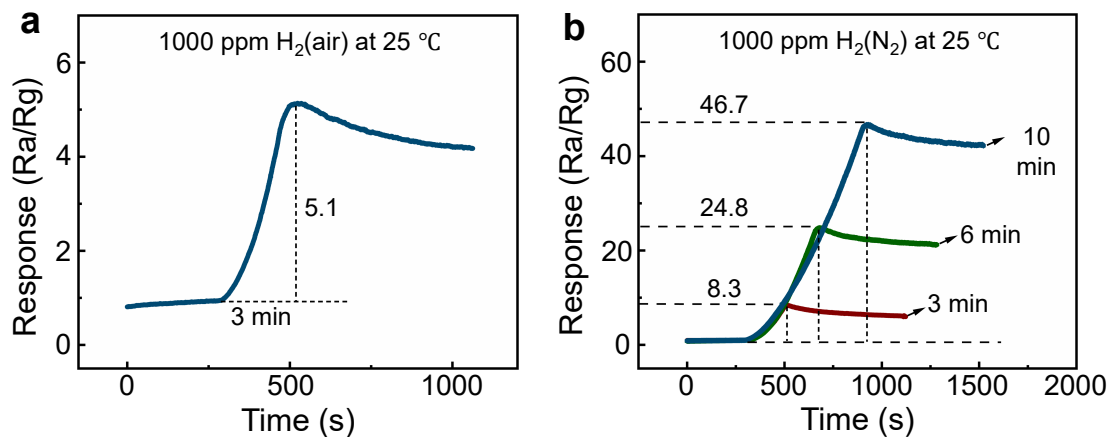

**Supplementary Figure 19** | Room-temperature (25 °C) dynamic response of the PdO/WO<sub>3</sub>-20s sensor to 1000 ppm H<sub>2</sub> under different background atmospheres: (a) in air; (b) in N<sub>2</sub> with different exposure durations (3, 6 and 10 min).

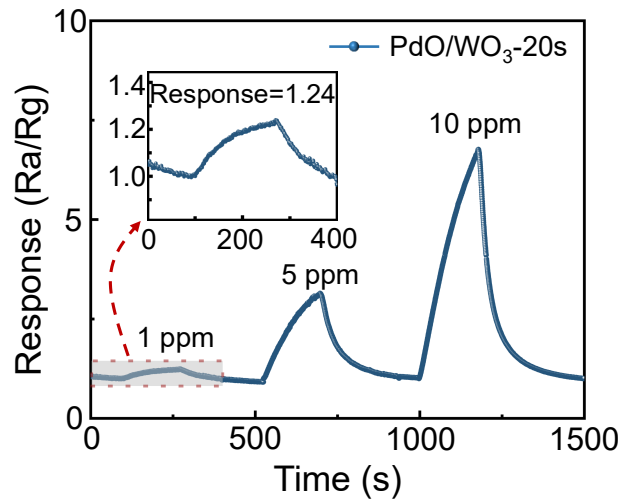

**Supplementary Figure 20** | The dynamic response-recovery curves of PdO/WO<sub>3</sub>-20s sensor to different concentrations (1-10 ppm) of H<sub>2</sub> at 175 °C.

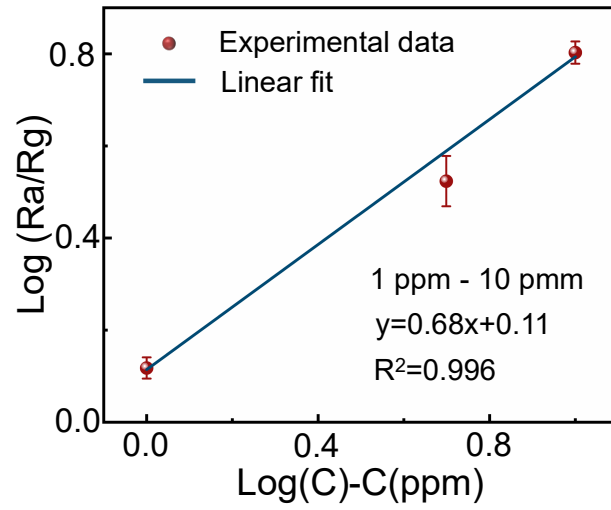

**Supplementary Figure 21** | The corresponding log (Ra/Rg)-log(C) fitted curves (The unit of C is ppm).

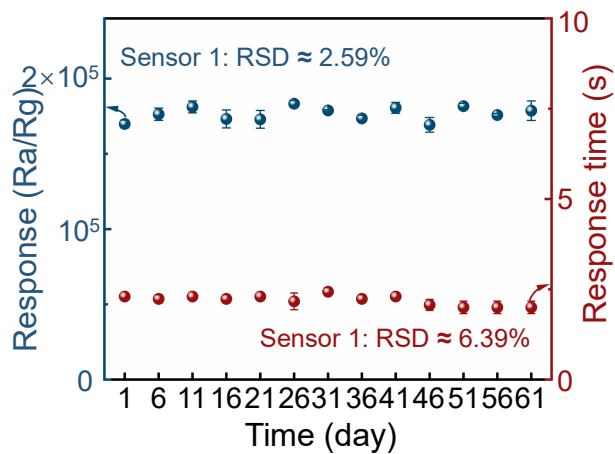

**Supplementary Figure 22** | The response and response time of the PdO/WO<sub>3</sub>-20s sensor to 1000 ppm H<sub>2</sub> at 175 °C for 2 months.

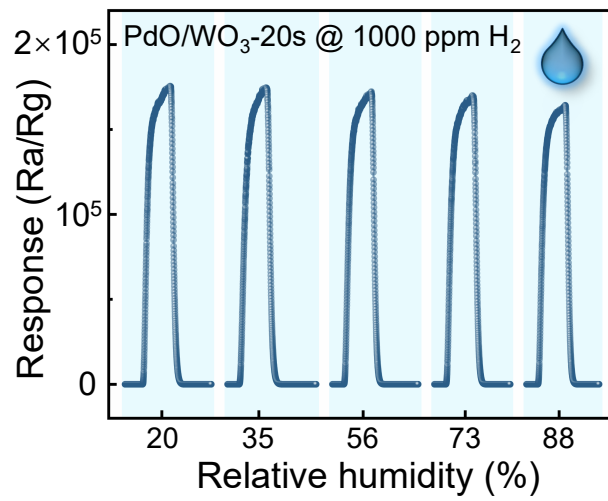

**Supplementary Figure 23** | The effect of different relative humidities (RH) on the transient response curve of the PdO/WO<sub>3</sub>-20s sensor.

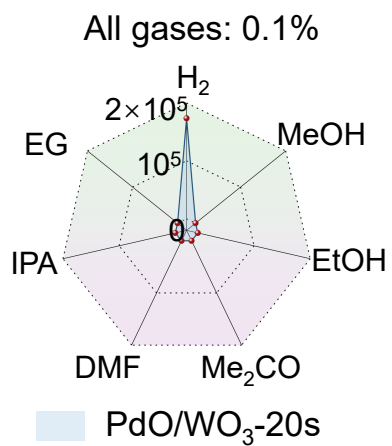

**Supplementary Figure 24** | Relative responses of PdO/WO<sub>3</sub>-20s sensor towards 1000 ppm of various gases at 175 °C.

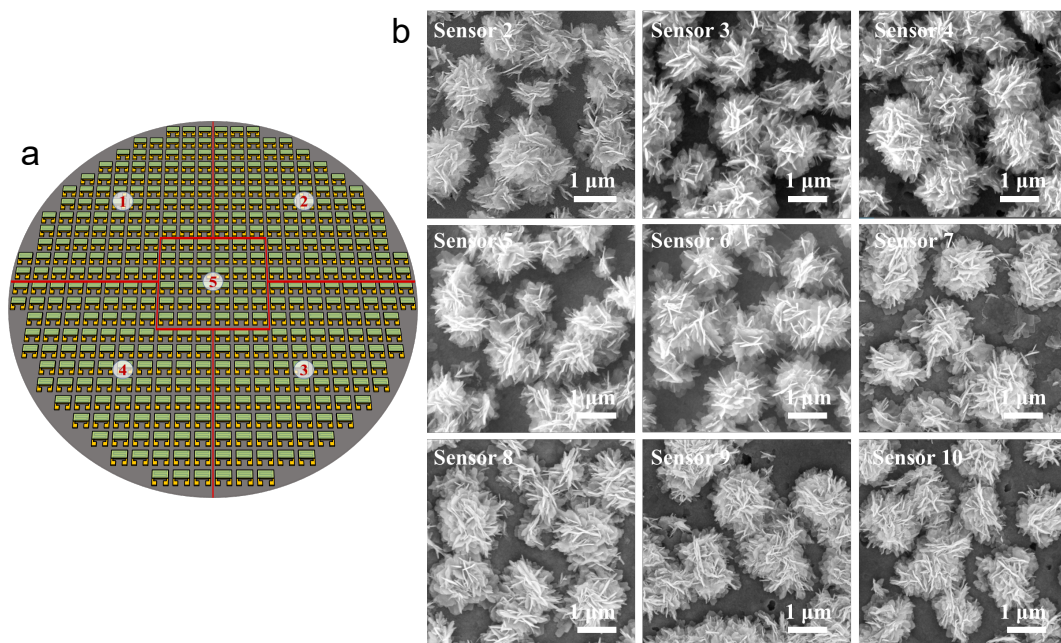

**Supplementary Figure 25** | a A schematic diagram of the wafer, divided into five regions; b Surface morphology of gas sensors (cut from the same wafer) in different regions.

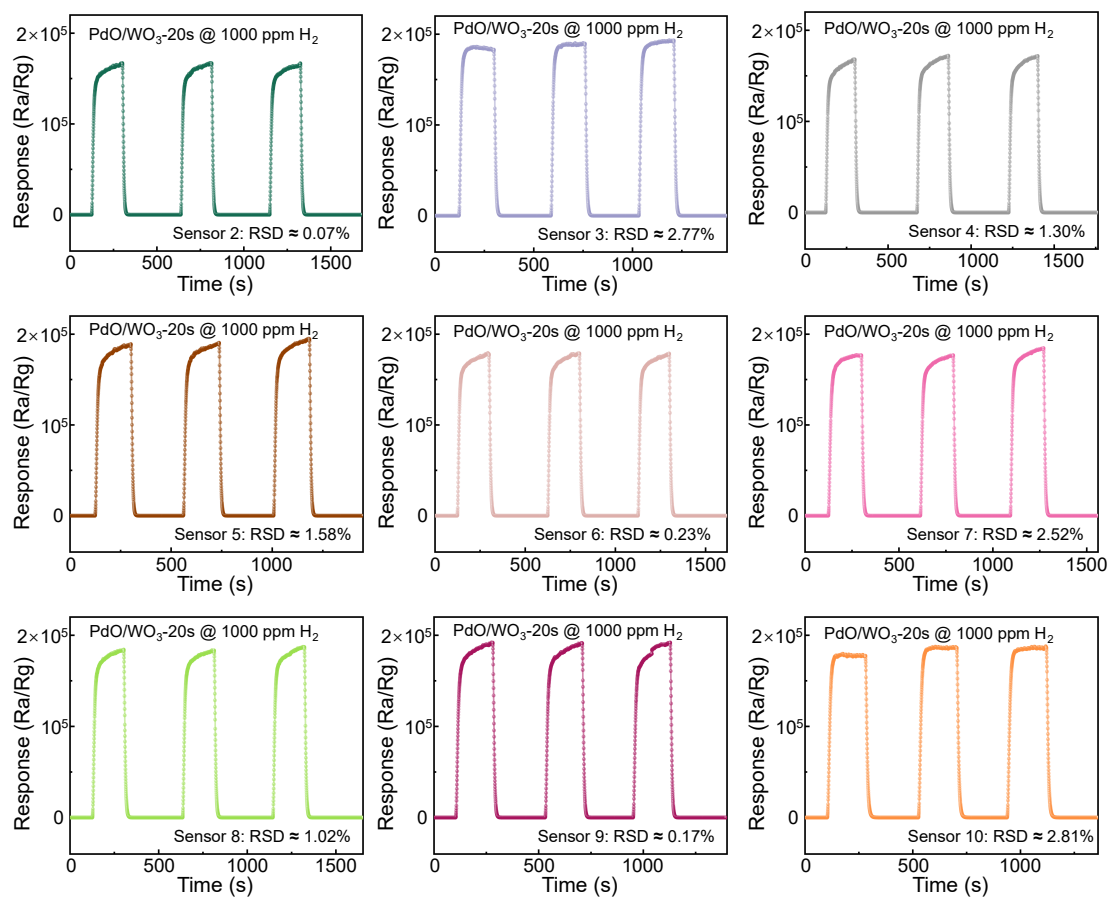

**Supplementary Figure 26** | Sensor consistency evaluation. The 3-cycle dynamic sensing response of PdO/WO<sub>3</sub>-20s sensor from different regions to 1000 ppm H<sub>2</sub>.

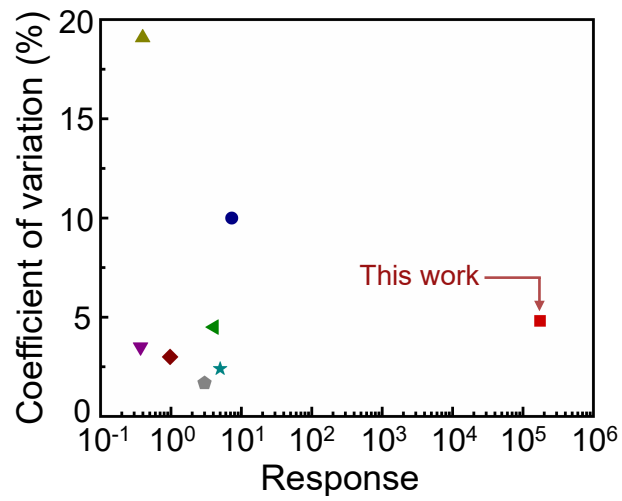

**Supplementary Figure 27** | Comparison of the responsivity and device-to-device consistency of various wafer-scale devices reported in recent literature.

This figure indicates that our devices retain a high response while exhibiting inter-device consistency comparable to that reported in the literature.

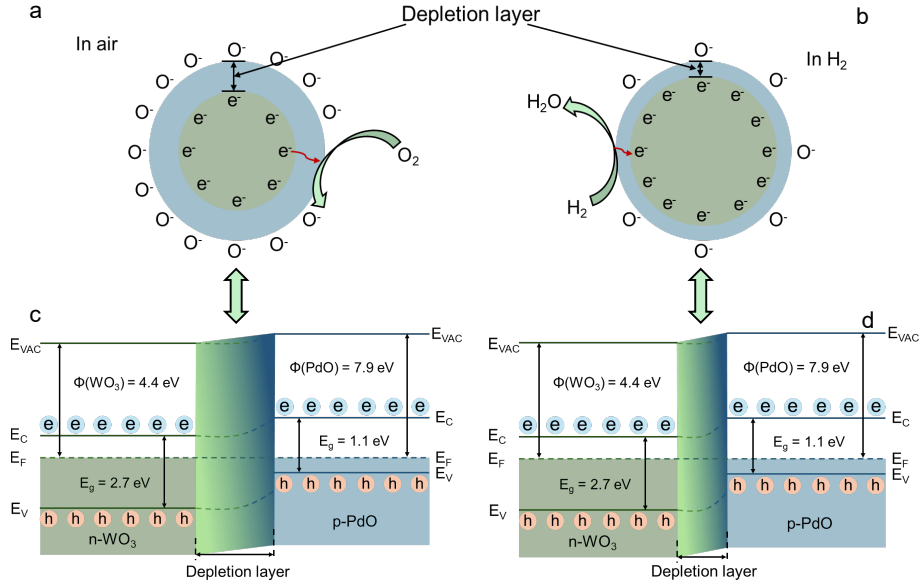

**Supplementary Figure 28** | The hydrogen sensing mechanism of the PdO/WO<sub>3</sub> sensor. (a, b) Schematic diagrams of the sensing process of PdO-WO<sub>3</sub> exposed to air and H<sub>2</sub> gas, respectively, and the corresponding energy band structures of the PdO-WO<sub>3</sub> nanostructure surface region (c, d).

### Hydrogen-sensing mechanism of the PdO/WO<sub>3</sub> sensor

The PdO/WO<sub>3</sub> sensor achieves highly sensitive hydrogen detection through multiple synergistic factors, including the temperature effect, nanoscale effects, the catalytic spillover effect of PdO, and the p-n junction formed between PdO nanoparticles and WO<sub>3</sub> nanostructures. In addition, the innovative microchannel design plays an important role in optimizing gas-detection capability.

It is well known that, when the sensor is exposed to air, oxygen molecules adsorb on the PdO/WO<sub>3</sub> surface. As schematically illustrated in Supplementary Fig. 28(a), across different operating-temperature ranges, oxygen molecules (O<sub>2</sub>) capture free electrons from the conduction band of WO<sub>3</sub> and form ionized oxygen species, such as O<sub>2</sub><sup>-</sup>, O<sup>-</sup>, and O<sub>2</sub><sup>2-7</sup>. The corresponding reactions can be described by Eqs. (1-4).

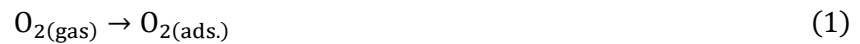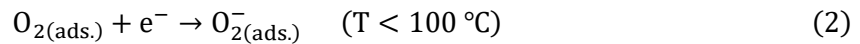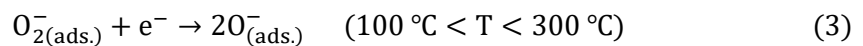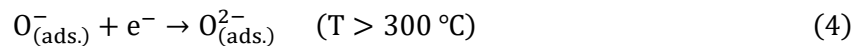

This process increases the depletion region at the WO<sub>3</sub> surface, thereby raising the baseline resistance. Moreover, temperature strongly influences both the response time and sensitivity of gas sensors: higher temperatures generally accelerate surface reaction rates and

adsorption/desorption kinetics, leading to enhanced responses and shortened response/recovery times<sup>8</sup>.

Upon exposure to hydrogen, PdO lowers the activation energy for hydrogen adsorption and catalyses the dissociation of H<sub>2</sub> molecules into H atoms. These H atoms can react with pre-adsorbed oxygen ions (Supplementary Fig. 28(b)), releasing additional free electrons back to the conduction band and thus decreasing the sensor resistance<sup>9</sup>. This process is represented by Eqs. (5, 6).

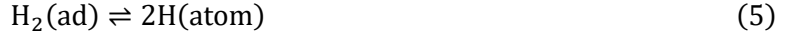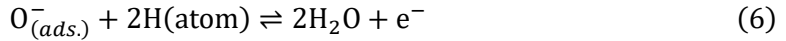

In addition, Pd loading increases the concentration of oxygen vacancies (O<sub>v</sub>) on the material surface, as confirmed by the XPS results discussed above. Oxygen defects provide additional reactive sites, enabling more adsorbed oxygen to participate in reactions with hydrogen, inducing larger resistance changes and thereby improving the sensor response<sup>10</sup>. Furthermore, the dissociated H atoms can diffuse to the WO<sub>3</sub> nanosheet surface via the spillover effect, and may further intercalate into the WO<sub>3</sub> lattice to form “HWO<sub>x</sub>”<sup>11, 12</sup>. The corresponding reactions can be described by Eqs. (7, 8).

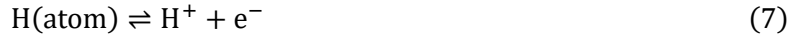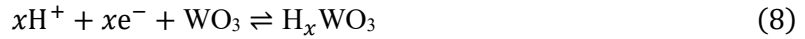

These reactions reduce the oxidation state of W lattice sites and increase the electron concentration in this n-type oxide (thereby lowering the sensor resistance)<sup>13, 14</sup>.

The nanoscale characteristics of the PdO/WO<sub>3</sub> hybrid also play a crucial role in enhancing sensing performance. PdO and WO<sub>3</sub> in nanostructured forms possess large surface areas, which increases the number of available active sites and facilitates more gas–surface reactions<sup>15</sup>. In addition, the microchannel design—an innovation of the PdO/WO<sub>3</sub> sensor—substantially strengthens the interaction between gas molecules and the sensing material. These microchannels enable gas to fully access the sensing surface and reduce “dead-zone” areas, thereby increasing the probability of gas adsorption and reaction. By establishing well-defined flow pathways, the microchannel architecture lowers diffusion resistance and ensures rapid and efficient gas transport to and from the reactive interface, which shortens response times and improves detection performance.

Finally, the p–n junction formed between PdO nanoparticles and WO<sub>3</sub> nanostructures constitutes another important component of the sensing mechanism. When a PdO–WO<sub>3</sub> p–n heterostructure forms, the two oxides have different work functions (WO<sub>3</sub>: Φ = 4.40 eV; PdO: Φ = 7.90 eV), and free electrons tend to transfer from the side with higher Fermi level to the side with lower Fermi level until a common equilibrium Fermi level is established<sup>4</sup>. During this process, the WO<sub>3</sub> nanosheets near the heterointerface lose additional electrons, resulting in a wider depletion layer (Supplementary Fig. 28(c)) and a higher baseline resistance<sup>16</sup>. When hydrogen adsorbs on the PdO/WO<sub>3</sub> surface, it reacts at oxygen-vacancy-related sites and alters

the electronic structure at the p–n junction, leading to a decrease in sensor resistance (Supplementary Fig. 28(d)). The interaction between PdO and WO<sub>3</sub> further enhances charge-transfer efficiency, amplifies the electrical signal, and increases the hydrogen sensitivity.

In summary, the hydrogen sensitivity of the PdO/WO<sub>3</sub> nanohybrid sensor is jointly determined by the temperature effect, nanoscale features and microchannel design, the catalytic spillover effect of PdO, and the p–n junction formed between PdO and WO<sub>3</sub>. The combined action of these factors enables stable operation with high sensitivity and rapid response.

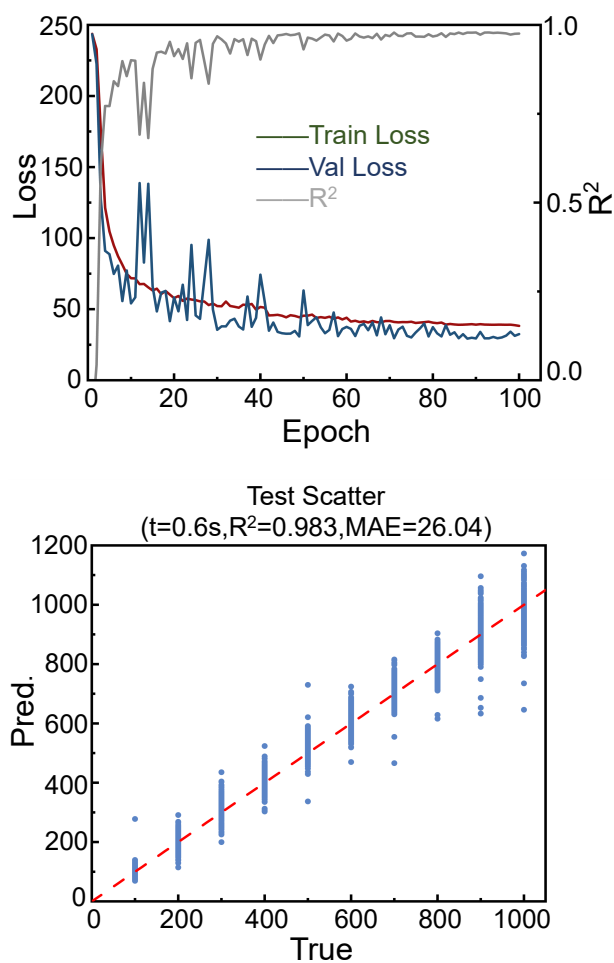

**Supplementary Figure 29** | Training dynamics and testing performance of the adapted Patch-Transformer.

Training curves: Synchronized convergence of training and validation L1 losses over 100 epochs, alongside the rising validation  $R^2$ . The tight alignment of loss curves confirms robust learning without overfitting. Testing scatter plot: Comparison between predicted and actual concentrations on the test set. Data points tightly hug the identity line ( $y=x$ ), demonstrating high-precision prediction ( $R^2 > 0.98$ ) even with short transient inputs.

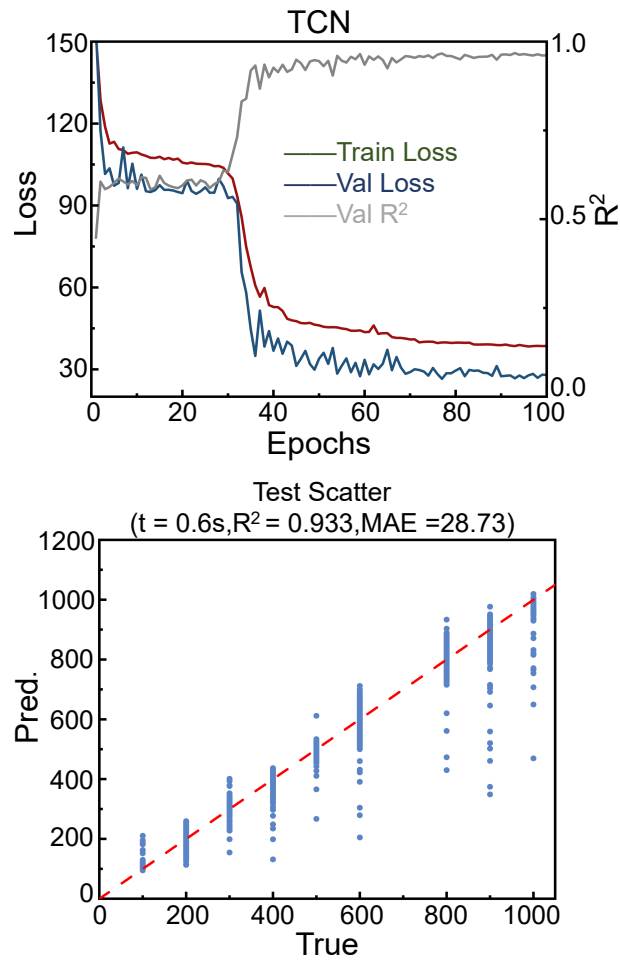

**Supplementary Figure 30** | Performance evaluation of the TCN architecture.

The learning curves exhibit a comparatively sluggish convergence profile, indicating optimization challenges in capturing short-term signal features. Despite maintaining a respectable validation  $R^2$ , the testing scatter plot reveals significant dispersion, with distinct outliers deviating from the identity line. This highlights the instability of the TCN architecture in resolving atypical transient fluctuations compared to the Transformer-based approach.

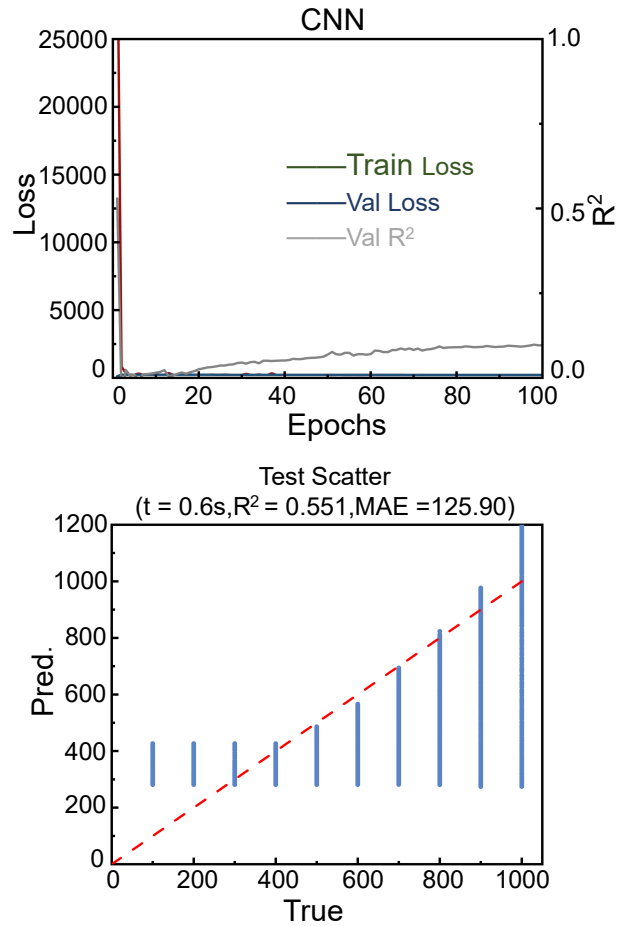

**Supplementary Figure 31** | Performance evaluation of the CNN architecture.

Both training and validation loss curves plateau at elevated levels with sluggish decay, indicating significant underfitting and an inability to effectively learn the underlying data patterns. The testing scatter plot exhibits substantial dispersion, with a large proportion of samples deviating severely from the identity line. This confirms that a pure convolutional architecture is inadequate for establishing a valid mapping between short-term transient signals and gas concentrations.

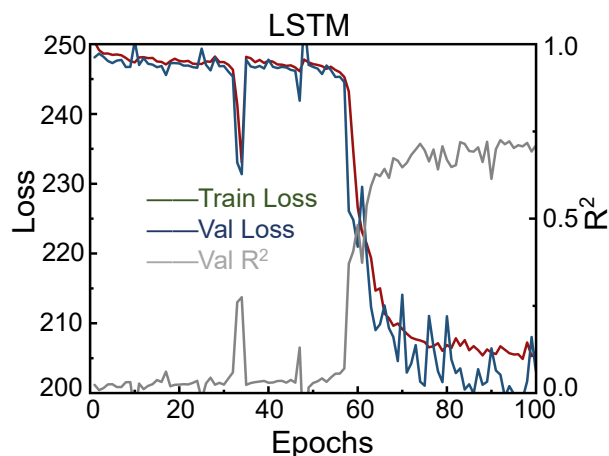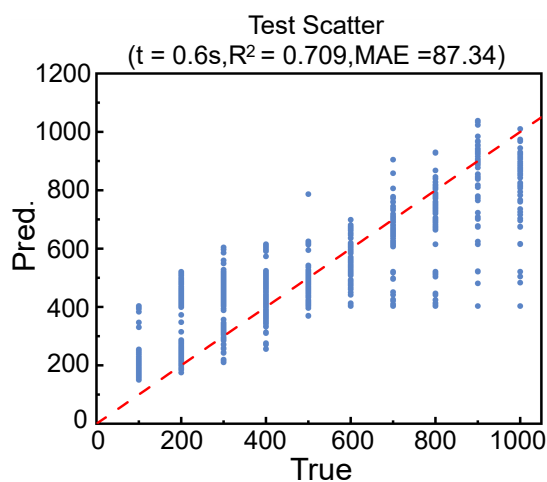

**Supplementary Figure 32** | Performance evaluation of the LSTM architecture.

The training trajectory exhibits a protracted convergence profile, indicating inefficiencies in gradient optimization for short-term feature extraction. The testing scatter plot reveals considerable dispersion, particularly at higher concentrations, confirming that the recurrent architecture lacks the requisite sensitivity and stability to accurately resolve such ultra-short transient signals.

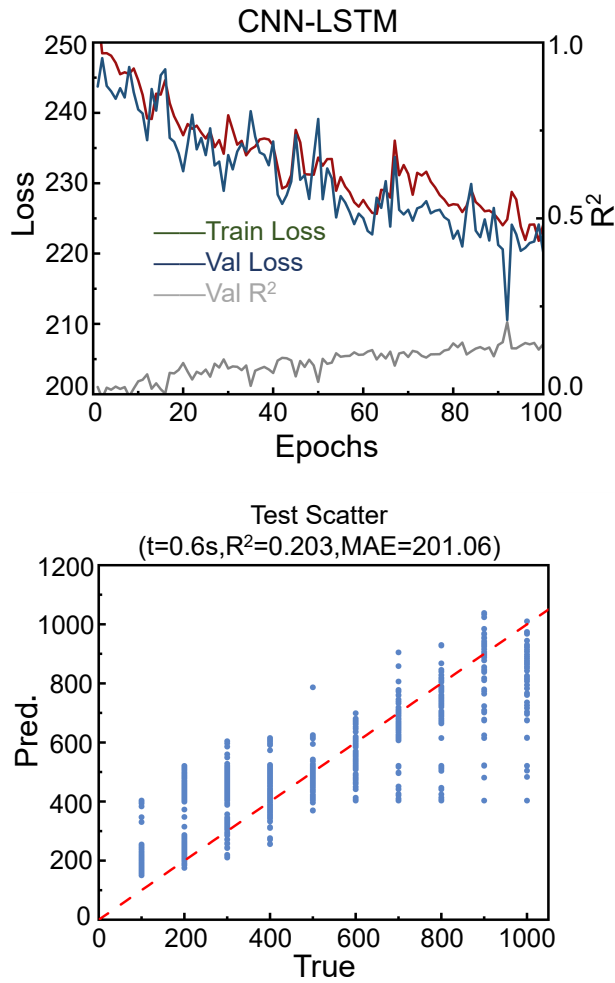

**Supplementary Figure 33** | Performance evaluation of the CNN-LSTM architecture.

The hybrid architecture exhibits poor convergence performance, with both training and validation losses failing to reach effective minima. The final error is significantly higher than all other baselines, indicating that the inclusion of the LSTM structure induces detrimental interference for short-term signal processing. The testing scatter plot reveals excessive prediction bias and dispersion, confirming the failure of this complex architecture to establish valid feature mapping within the 0.6 s micro-window.

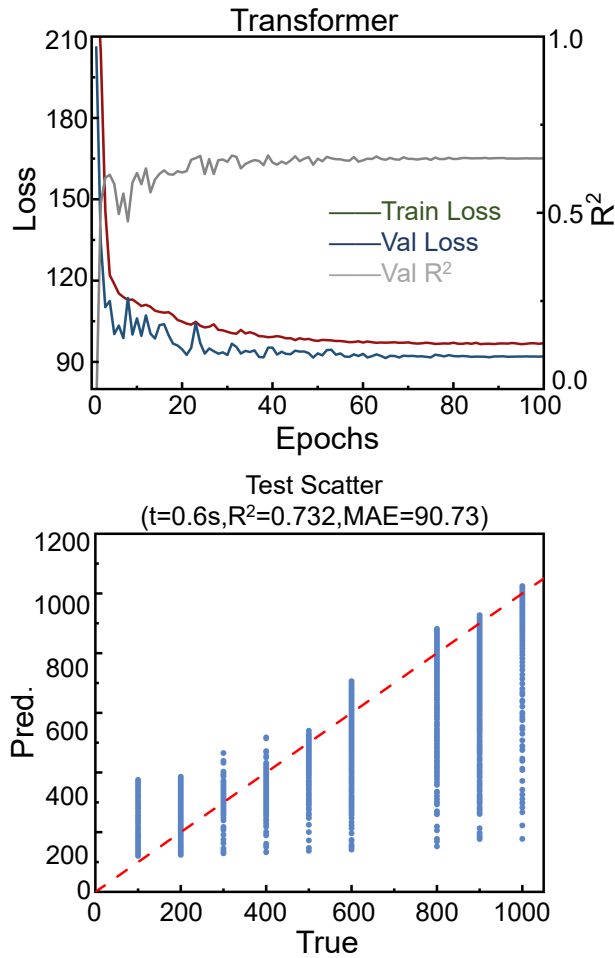

**Supplementary Figure 34** | Performance evaluation of the standard Transformer architecture.

The model employs a point-wise attention mechanism without patch embedding. The learning curves indicate that both convergence speed and final accuracy fall short of the adapted Patch-Transformer. While the self-attention mechanism establishes global dependencies, the testing scatter plot reveals moderate dispersion. This suggests that without local feature aggregation (patching), the model remains susceptible to signal noise.

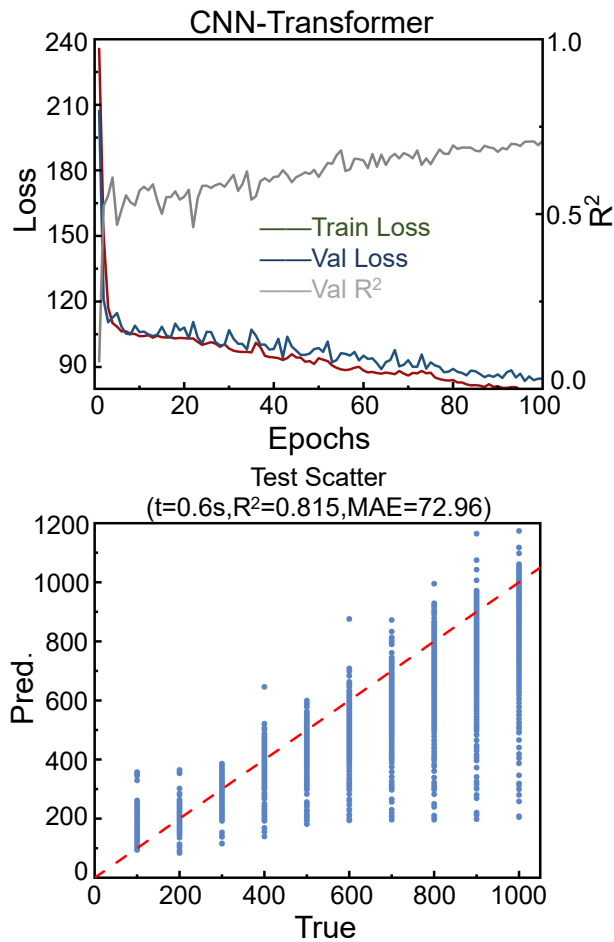

**Supplementary Figure 35** | Performance evaluation of the CNN-Transformer architecture.

This hybrid model attempts to synergize convolutional feature extraction with self-attention mechanisms. The learning curves show a slightly faster convergence compared to the standard Transformer, validating the contribution of convolutional layers in local feature extraction. However, the testing scatter plot fails to demonstrate a significant accuracy breakthrough, still exhibiting noticeable prediction divergence. This suggests that naive module stacking does not resolve the core challenges of short-term sequence modeling and instead increases optimization complexity.

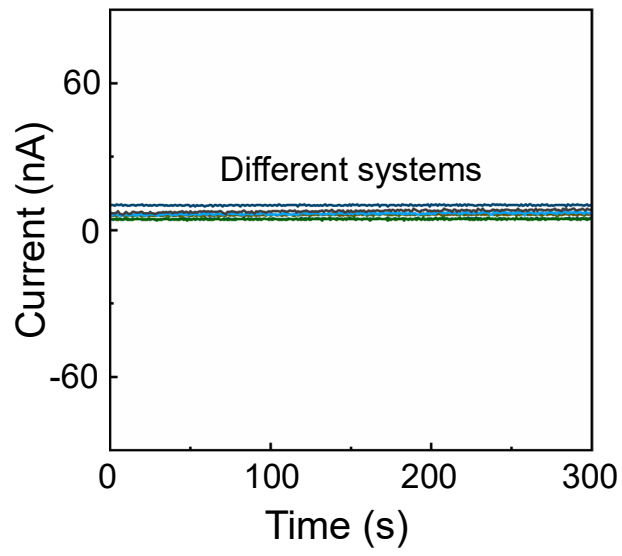

**Supplementary Figure 36** | The entire system exhibits excellent output consistency.

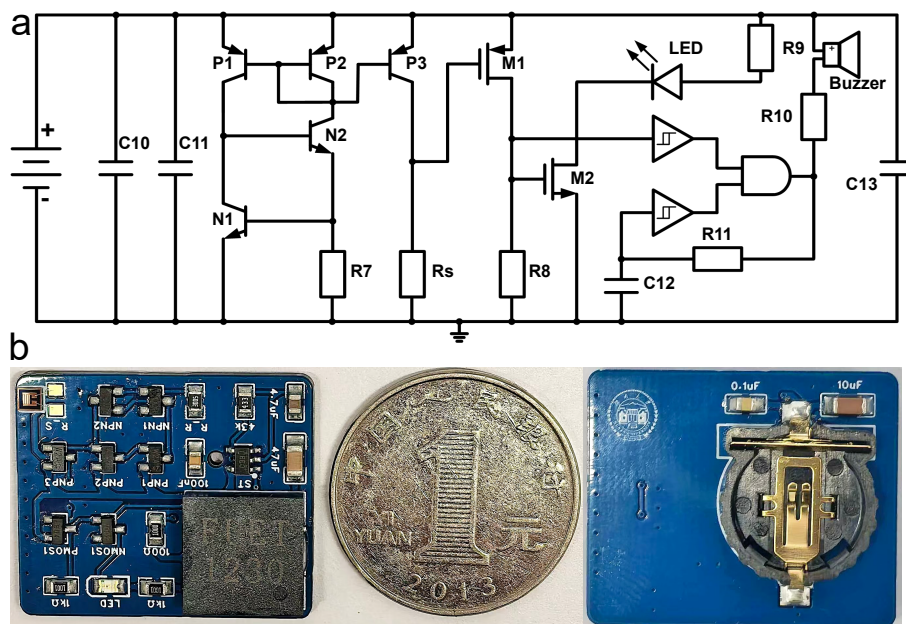

**Supplementary Figure 37** | Hydrogen leak detection system. a Circuit diagram for hydrogen leakage monitoring. b Actual product image. When the sensor detects a hydrogen leak, the alarm module is activated: the LED turns on and the passive buzzer emits an alarm sound.

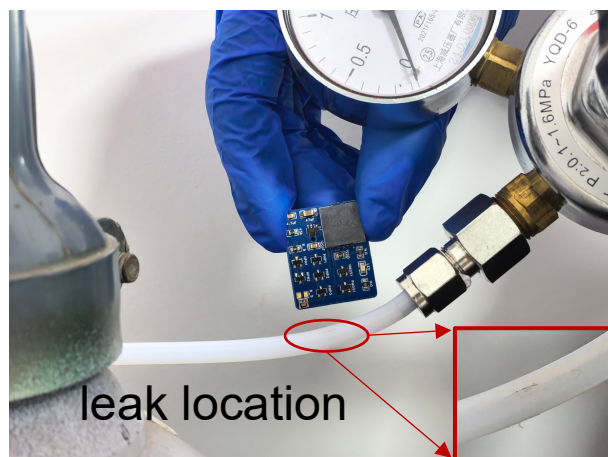

**Supplementary Figure 38** | Experimental setup used to emulate a realistic hydrogen pipeline leak and demonstrate the alarm device; the leak location is highlighted (red circle), and the inset shows a magnified view of the damaged section of the tubing.

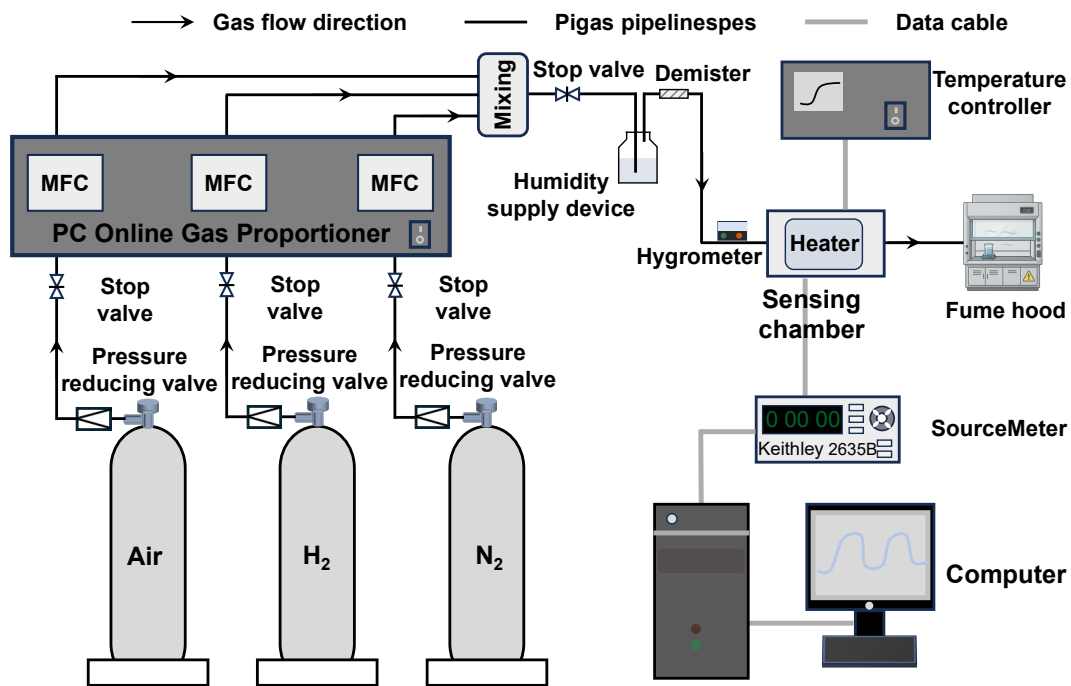

**Supplementary Figure 39** | Schematic diagram of the dynamic gas distribution system for H<sub>2</sub> sensing tests.

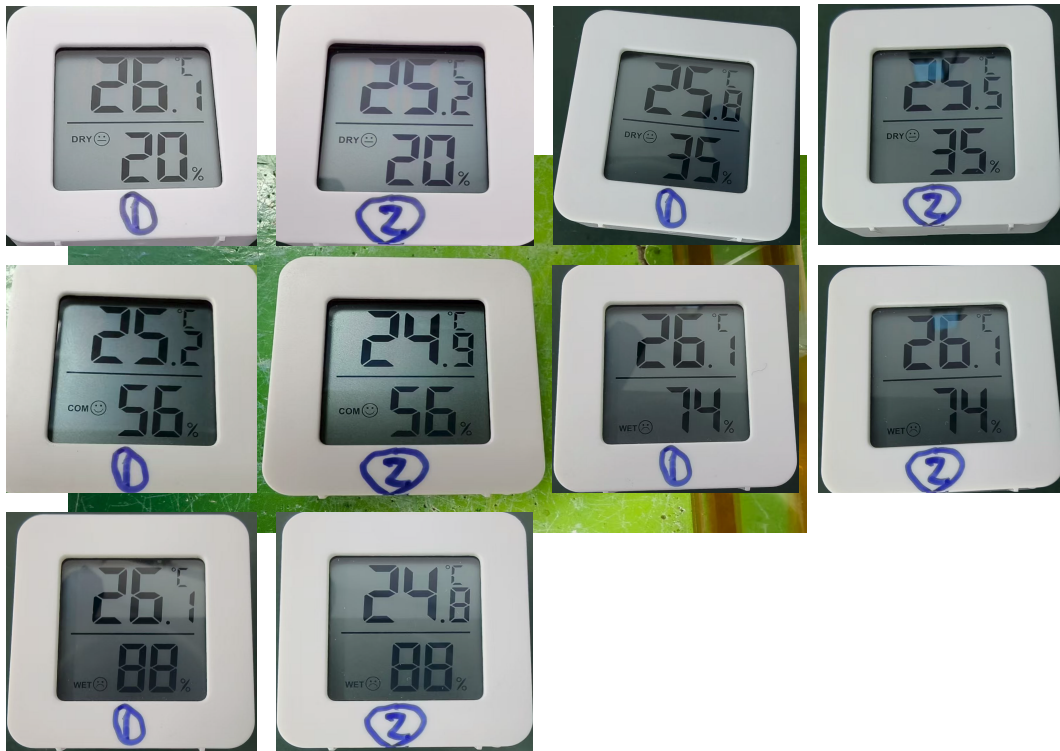

**Supplementary Figure 40** | Two commercially available humidity sensors were used to measure the actual humidity of the air entering the test chamber.

To ensure traceability of the inlet conditions and the reliability of the measurements, two calibrated commercial hygrometers were positioned at the test-chamber inlet to provide parallel monitoring of the incoming gas and an independent verification of its relative humidity prior to each experiment.

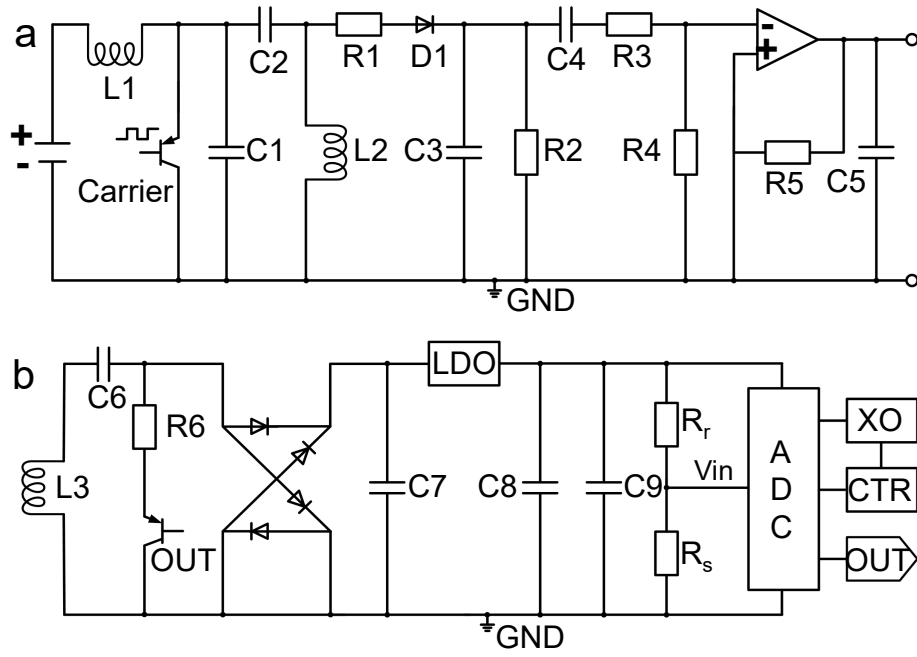

**Supplementary Figure 41** | The Schematic circuit diagram of circuit board. a Master circuit Schematic, b Slave circuit Schematic.

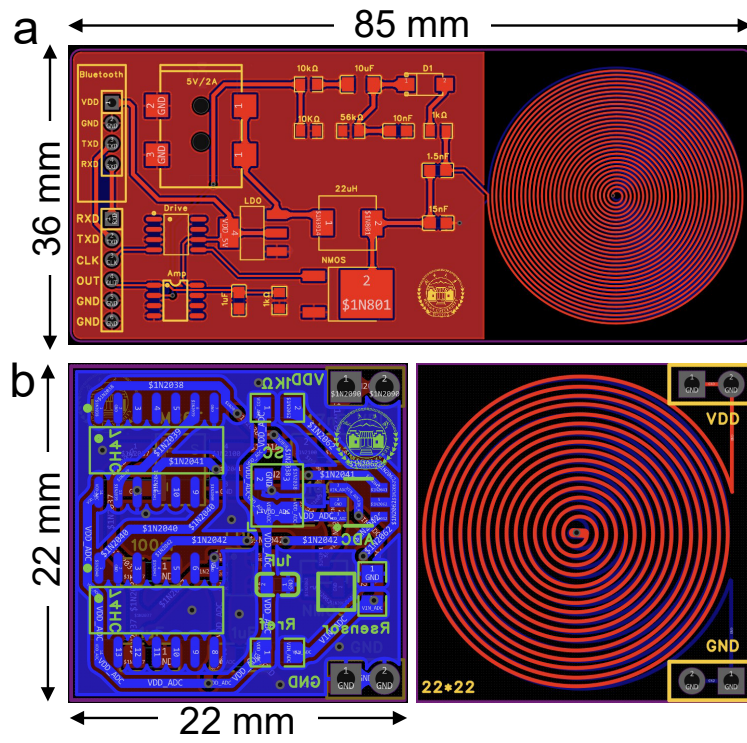

**Supplementary Figure 42** | The layouts of the printed circuit board (PCB) . a Master circuit PCB, b Slave circuit PCB.

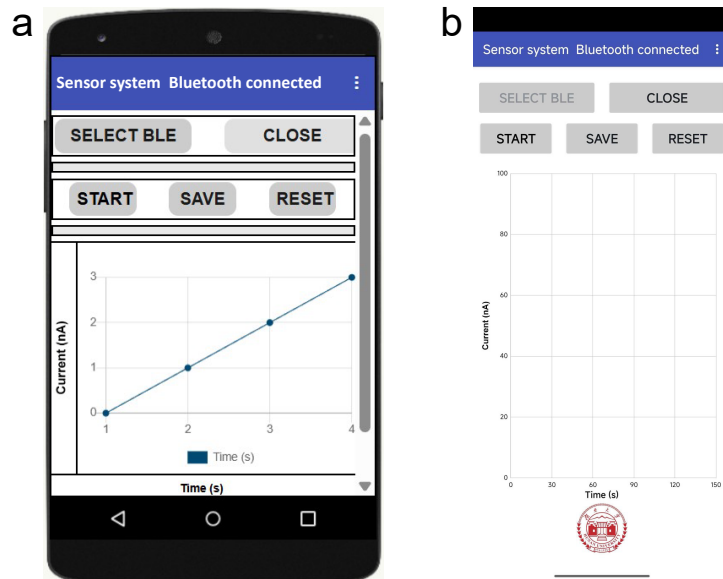

**Supplementary Figure 43** | User interface of the developed gas-sensing application: (a) component design view in (MIT) App Inventor; (b) screenshot of the mobile app interface.

**Supplementary Table 1** | Calculation details of the transformation from  $\text{WO}_3 \cdot \text{H}_2\text{O}$  to  $\text{WO}_3 \cdot 2\text{H}_2\text{O}$ .

| Lattice parameters of $\text{WO}_3 \cdot \text{H}_2\text{O}$ (the unit cell contains 4 $\text{WO}_3 \cdot \text{H}_2\text{O}$ , i.e. 4 W atoms)     |                                                                                                                                      |          |              |             |              |
|-----------------------------------------------------------------------------------------------------------------------------------------------------|--------------------------------------------------------------------------------------------------------------------------------------|----------|--------------|-------------|--------------|
| a (Å)                                                                                                                                               | b (Å)                                                                                                                                | c (Å)    | $\alpha$ (°) | $\beta$ (°) | $\gamma$ (°) |
| 5.09655                                                                                                                                             | 5.33168                                                                                                                              | 10.48044 | 90.0000      | 90.0000     | 90.0000      |
| Lattice parameters of $\text{WO}_3 \cdot 2\text{H}_2\text{O}$ (the unit cell contains 16 $\text{WO}_3 \cdot 2\text{H}_2\text{O}$ , i.e. 16 W atoms) |                                                                                                                                      |          |              |             |              |
| a (Å)                                                                                                                                               | b (Å)                                                                                                                                | c (Å)    | $\alpha$ (°) | $\beta$ (°) | $\gamma$ (°) |
| 10.38471                                                                                                                                            | 13.10491                                                                                                                             | 10.47853 | 90.0000      | 90.7579     | 90.0000      |
| Specific energy calculation data                                                                                                                    |                                                                                                                                      |          |              |             |              |
| $4[\text{WO}_3 \cdot \text{H}_2\text{O}]$                                                                                                           | -208.46183                                                                                                                           |          | -52.1154575  |             |              |
| $\text{H}_2\text{O}$                                                                                                                                | -14.365985                                                                                                                           |          | -14.365985   |             |              |
| $16[\text{WO}_3 \cdot 2\text{H}_2\text{O}]$                                                                                                         | -1071.125                                                                                                                            |          | -66.9453125  |             |              |
| Formation energy (eV)                                                                                                                               | $\Delta E = E(\text{WO}_3 \cdot 2\text{H}_2\text{O}) - [E(\text{WO}_3 \cdot \text{H}_2\text{O}) + E(\text{H}_2\text{O})] = -0.46387$ |          |              |             |              |

After  $\text{WO}_3 \cdot \text{H}_2\text{O}$  adsorbs water molecules and becomes  $\text{WO}_3 \cdot 2\text{H}_2\text{O}$ , the number of water molecules between  $\text{WO}_3$  layers increases, and the fluctuation of W atoms in the z direction becomes smaller. At the same time, the hydrogen bond interaction between water molecules will change the orientation of water molecules, and the overall structural symmetry will decrease. The negative formation energy indicates  $\text{WO}_3 \cdot 2\text{H}_2\text{O}$  is more stable in energy.

**Supplementary Table 2** | EDS element ratios of W, O, and Pd at different Pd deposition times.

| Element | Atom No. | At. % |      |      |      |      |      | Normalized wt. % |       |       |       |       |       | wt. % Sigma |      |      |      |      |      |
|---------|----------|-------|------|------|------|------|------|------------------|-------|-------|-------|-------|-------|-------------|------|------|------|------|------|
|         |          | 0 s   | 5 s  | 10 s | 15 s | 20 s | 25 s | 0 s              | 5 s   | 10 s  | 15 s  | 20 s  | 25 s  | 0 s         | 5 s  | 10 s | 15 s | 20 s | 25 s |
| W       | 74       | 29.8  | 27.8 | 26.4 | 30.4 | 29.5 | 27.0 | 83.0             | 80.92 | 79.12 | 81.54 | 80.16 | 77.41 | 0.29        | 0.42 | 0.47 | 0.36 | 0.36 | 1.29 |
| O       | 8        | 70.2  | 71.6 | 72.5 | 68.0 | 68.1 | 69.9 | 17.0             | 18.13 | 18.91 | 15.88 | 16.10 | 17.42 | 0.29        | 0.32 | 0.36 | 0.26 | 0.25 | 0.87 |
| Pd      | 46       | 0     | 0.6  | 1.1  | 1.7  | 2.4  | 3.1  | 0                | 0.95  | 1.97  | 2.58  | 3.74  | 5.16  | 0           | 0.32 | 0.36 | 0.28 | 0.28 | 1.02 |

**Supplementary Table 3** | Determine the percentages of elements  $O_L$ ,  $O_V$ , and  $O_{ad}$  in the samples at 11-15min-0s and 11-15min-20s by XPS.

| 11-15min-0s  |           |                |                    |
|--------------|-----------|----------------|--------------------|
| Valence      | Peak area | Percentage (%) | Proportional value |
| $O_L$        | 14515.36  | 71.69          | 71.7               |
| $O_V$        | 2577.36   | 12.73          | 12.7               |
| $O_{ad}$     | 3155.86   | 15.59          | 15.6               |
| 11-15min-20s |           |                |                    |
| Valence      | Peak area | Percentage (%) | Proportional value |
| $O_L$        | 192666.26 | 32.3           | 32                 |
| $O_V$        | 124247.33 | 20.8           | 21                 |
| $O_{ad}$     | 278810.55 | 46.8           | 47                 |

**Supplementary Table 4** | Percentage of element Pd<sup>0</sup>, Pd<sup>2+</sup> and Pd<sup>4+</sup> determined from XPS.

| Valence          | Peak area | Percentage (%) | Proportional value |
|------------------|-----------|----------------|--------------------|
| Pd <sup>0</sup>  | 69254.70  | 16.8           | 2                  |
| Pd <sup>2+</sup> | 307752.20 | 74.8           | 9                  |
| Pd <sup>4+</sup> | 34572.8   | 8.4            | 1                  |

**Supplementary Table 5** | Comparison of the performance of different wafer-level gas sensing devices.

| Active materials                                                      | Synthesis method                                   | Gas                              | Temp. (°C) | Conc. (ppm) | Response                             | Response time (s) | RSD          | Ref.      |
|-----------------------------------------------------------------------|----------------------------------------------------|----------------------------------|------------|-------------|--------------------------------------|-------------------|--------------|-----------|
| PdO/WO <sub>3</sub> nanosheets                                        | Magnetron sputtering and Chemical etching          | H <sub>2</sub>                   | 175        | 1000        | 1.74*10 <sup>5</sup><br>Ra/Rg        | 2.3               | 4.45%        | This work |
| Pd NPs/Si nanoforest                                                  | Electron beam evaporation                          | H <sub>2</sub>                   | RT         | 10000       | 1685%<br>Rg/Ra*100%                  | 376               | 1.15%        | 17        |
| Pd-Ni alloy layered film                                              | Electron beam evaporation                          | H <sub>2</sub>                   | 70         | 10000       | ~0.6%<br>ΔR/Ra*100%                  | 1                 | --           | 18        |
| Pt NPs-d-microporous SnO <sub>2</sub>                                 | Template method                                    | H <sub>2</sub> S                 | 250        | 20          | 555.70<br>Ra/Rg                      | 45.6              | --           | 19        |
| Pd-Ni alloy film                                                      | Magnetron cosputtering                             | H <sub>2</sub>                   | 75         | 40000       | ~2.3%<br>ΔR/Ra*100%                  | 1.5               | --           | 20        |
| Rh/SnO <sub>2</sub>                                                   | Colloidal polymer-directing                        | C <sub>2</sub> H <sub>5</sub> OH | 300        | 5           | ~12.5<br>Ra/Rg                       | --                | 2.4–5.6<br>% | 21        |
| Pd NPs                                                                | Electron beam evaporation                          | H <sub>2</sub>                   | RT         | 1000        | 4.86*10 <sup>6</sup> %<br>ΔR/Ra*100% | 51.84             | --           | 22        |
| μLED-integrated SnO <sub>2</sub> NPs                                  | Hydrothermal                                       | NO <sub>2</sub>                  | --         | 5           | 6928<br>ΔR/Ra                        | 47                | --           | 23        |
| In <sub>2</sub> O <sub>3</sub> -decorated SnO <sub>2</sub> nanosheets | Hydrothermal                                       | Aniline                          | 290        | 70          | 7.3<br>Ra/Rg                         | --                | < 10%        | 24        |
| Pd/SnO <sub>2</sub>                                                   | Magnetron sputtering and ALD                       | H <sub>2</sub>                   | 150        | 500         | ~16<br>Ra/Rg                         | --                | 1.68%        | 25        |
| CNT                                                                   | Microwave synthesis                                | H <sub>2</sub>                   | 75         | 300         | 368%<br>ΔI/Ia*100%                   | 15                | --           | 26        |
| Pd/WS <sub>2</sub>                                                    | Electron beam evaporation                          | NO <sub>2</sub>                  | RT         | 1           | ~11%<br>ΔI/Ia*100%                   | --                | --           | 27        |
| Pt/Y <sub>2</sub> O <sub>3</sub>                                      | Magnetron sputtering and Electron beam evaporation | H <sub>2</sub> S                 | 150        | 1           | 97.3%<br>ΔI/Ia*100%                  | --                | ~3%          | 28        |
| SnO <sub>2</sub>                                                      | Magnetron sputtering                               | H <sub>2</sub>                   | 400        | 400         | 4<br>Ra/Rg                           | --                | --           | 29        |
| Pd                                                                    | Block copolymer self-assembly                      | H <sub>2</sub>                   | RT         | 40000       | ~12.4%<br>Rg/Ra                      | 16                | --           | 30        |

|                                                 |                      |                                  |     |        |                               |     |        |    |
|-------------------------------------------------|----------------------|----------------------------------|-----|--------|-------------------------------|-----|--------|----|
| SnO <sub>2</sub>                                | Hydrothermal         | C <sub>2</sub> H <sub>5</sub> OH | 300 | 500    | 4.1<br>Ra/Rg                  | --  | ~4.5%  | 31 |
| 3D graphene                                     | MOCVD                | NO <sub>2</sub>                  | RT  | 5      | ~15%<br>$\Delta R/R_0*100\%$  | --  | --     | 32 |
| CNT                                             | Solution-derived     | H <sub>2</sub>                   | RT  | 20     | ~140%<br>$\Delta R/R_0*100\%$ | ~ 9 | --     | 33 |
| Pd-GaN-HN                                       | Magnetron sputtering | H <sub>2</sub>                   | 70  | 1000   | 7.88%<br>$\Delta C/C_0*100\%$ | 1.3 | --     | 34 |
| MWCNTs                                          | Spray coating        | H <sub>2</sub>                   | 420 | 100000 | 1.82%<br>$\Delta R/R_0*100\%$ | 39  | --     | 35 |
| SnO <sub>2</sub>                                | RF sputtering        | C <sub>2</sub> H <sub>6</sub>    | RT  | 50     | 11.66<br>Rg/Ra                | < 1 | --     | 36 |
| Pt-decorated graphene                           | E-beam evaporator    | NH <sub>3</sub>                  | 27  | 50     | 8%<br>$\Delta R/R_a*100\%$    | --  | 19.09% | 37 |
| In <sub>2</sub> O <sub>3</sub>                  | Magnetron sputtering | H <sub>2</sub> S                 | 180 | 50     | 263%<br>$\Delta I/I_a*100\%$  | --  | --     | 38 |
| NiO                                             | In-situ growth       | H <sub>2</sub> S                 | 200 | 5      | 0.35-0.37<br>$\Delta V/V_g$   | --  | < 3.5% | 39 |
| Ga <sub>2</sub> O <sub>3</sub> -WO <sub>3</sub> | ALD                  | C <sub>2</sub> H <sub>5</sub> OH | 275 | 100    | 14<br>Ra/Rg                   | 3   | --     | 40 |

**Supplementary Table 6** | Performance comparison with prior studies under 1000 ppm H<sub>2</sub>, with this work indicated.

| Materials                                                                                                           | Synthesis method                                    | Temperature (°C) | Response                                 | Response Time (s) | Wafer-level | Year | Ref.      |
|---------------------------------------------------------------------------------------------------------------------|-----------------------------------------------------|------------------|------------------------------------------|-------------------|-------------|------|-----------|
| PdO/WO <sub>3</sub> nanosheets                                                                                      | Magnetron sputtering and Chemical etching           | 175              | 1.74×10 <sup>5</sup> Ra/Rg               | 2.3               | √           | --   | This work |
| DPP-DTT                                                                                                             | Spin-coating or printing                            | RT               | 1.19 × 10 <sup>4</sup> ΔR/R <sub>0</sub> | 0.84              | ×           | 2025 | 41        |
| Pd-In <sub>2</sub> O <sub>3</sub> (In <sub>2</sub> O <sub>3</sub> microspheres)                                     | Hydrothermal method                                 | 80               | 50.743 Ra/Rg                             | 80                | ×           | 2024 | 42        |
| Pd <sub>8</sub> SR <sub>16</sub> -SDBS-rGO (Thiolate-protected Pd nanoclusters (Pd <sub>8</sub> SR <sub>16</sub> )) | Solution method                                     | RT               | 4.48% ± 0.11% ΔR /Ra*100%                | 0.95              | ×           | 2024 | 43        |
| Pd-Si NWS-NAG (FET) (Pd NPs)                                                                                        | Electron beam evaporation                           | RT               | 4.86 × 10 <sup>6</sup> % ΔR /Ra*100%     | 51.84             | √           | 2024 | 22        |
| Pd-WO <sub>3</sub> /WS <sub>2</sub> Nanoflowers                                                                     | Hydrothermal                                        | 125              | 4227.35                                  | 1                 | ×           | 2024 | 4         |
| Pd-WO <sub>3</sub> (WS <sub>2</sub> films)                                                                          | RF-magnetron sputtering                             | 200              | 586 Ra/Rg                                | 360               | ×           | 2023 | 44        |
| Ni-CuO (Pure and nickel doped copper oxide thin films)                                                              | Spray pyrolysis method                              | 300              | 15.7% ΔI/Ia×100%                         | 459.4             | ×           | 2023 | 45        |
| (MoS <sub>2</sub> /GR) (MoS <sub>2</sub> spherical nanoparticles with 2D graphene layer)                            | Facile hydrothermal method                          | RT               | 8.1% ΔR/Ra*100%                          | 32                | ×           | 2022 | 46        |
| Pd-α-MoO <sub>3</sub> (α-MoO <sub>3</sub> with vertical nanowalls)                                                  | Magnetron sputtering and postoxidation              | 100              | 3.3× 10 <sup>5</sup> Ig/Ia               | 379               | ×           | 2022 | 47        |
| Pd(0.5%)-Fe <sub>2</sub> O <sub>3</sub> /rGO (Pd-loaded α-Fe <sub>2</sub> O <sub>3</sub> particles)                 | Hydrothermal                                        | 180              | 78.4% ΔR/Ra*100%                         | 19s               | ×           | 2022 | 48        |
| Orthorhombic Nb <sub>2</sub> O <sub>5-x</sub> nanobelts (NBs) with Pt/Ti electrode                                  | Hydrothermal, ion exchange, and annealing treatment | RT               | ~1.32 Rg/R0                              | 28                | ×           | 2022 | 49        |
| Copper thiocyanate (CuSCN)                                                                                          | Solution-processed                                  | RT               | 1.79 ΔI/Ia*100%                          | 402               | ×           | 2022 | 50        |

|                                                                                                                         |                                                           |     |                                     |      |   |      |    |
|-------------------------------------------------------------------------------------------------------------------------|-----------------------------------------------------------|-----|-------------------------------------|------|---|------|----|
| PdO-PdAu ternary hollow shells                                                                                          | Template Method                                           | RT  | —<br>$\Delta R/R_0$                 | 2.2  | × | 2022 | 51 |
| WO <sub>3</sub> -TiO <sub>2</sub> (WO <sub>3</sub> -TiO <sub>2</sub> heterostructural nanofibers (HNFs))                | Simple spin coating method                                | RT  | 78.21±0.35%<br>$\Delta R/R_a*100\%$ | 20   | × | 2021 | 52 |
| TiO <sub>2</sub> /PVP NFs (TiO <sub>2</sub> /PVP nanofibers (NFs))                                                      | Electrospinning method                                    | RT  | 63%<br>$\Delta I/I_a*100\%$         | 89.4 | × | 2021 | 53 |
| Pd/SnO <sub>2</sub> (SnO <sub>2</sub> films)                                                                            | ALD                                                       | RT  | ≈ 144.2<br>Ra/Rg                    | —    | × | 2021 | 54 |
| Pt-GaN (FET) (GaN honeycomb nanonetwork)                                                                                | Layer by molecule beam epitaxy                            | 120 | 16.7%<br>$\Delta I/I_a*100\%$       | ≤ 3  | × | 2021 | 55 |
| Honeycomb nanonetwork structure (GaN-HN)                                                                                | Molecular beam epitaxy technique                          | 70  | 7.88%<br>$\Delta C/C_0*100\%$       | 1.3  | √ | 2021 | 34 |
| rGO/SnO <sub>2</sub> /PVDF (rGO, SnO <sub>2</sub> and polyvinylidene fluoride (PVDF) tertiary nanocomposite thick film) | Hot press method and E-beam evaporation                   | RT  | 71.4%<br>$\Delta R/R_a*100\%$       | 52   | × | 2020 | 56 |
| Pd-WO <sub>3</sub> Porousfilm                                                                                           | Sol-gel                                                   | 250 | 956.52<br>Ra/Rg                     | ~7   | × | 2020 | 57 |
| Nanograined Pd or Pd@Pt coated high density electrospun nanofibers, on which                                            | Electrospun, yarn spinning followed by sputter deposition | RT  | 0.65%<br>$\Delta R/R_0$             | 44   | × | 2019 | 58 |
| SnO <sub>2</sub> (mesoporous SnO <sub>2</sub> (m-SnO <sub>2</sub> ) powders)                                            | Sol-gel method                                            | 400 | 22.2<br>Ra/Rg                       | 105  | × | 2017 | 59 |
| Pd/SnO <sub>2</sub> (Pd nanoparticles composited SnO <sub>2</sub> microspheres)                                         | Solvothermal method                                       | 200 | 129.08<br>Ra/Rg                     | —    | × | 2017 | 60 |
| WO <sub>3</sub> /SnO <sub>2</sub> Porous film                                                                           | Sol-gel                                                   | 225 | 29.31<br>Ra/Rg                      | 8.4  | × | 2017 | 61 |
| Pd NWs@ZIF-8_4 h (Pd nanowires)                                                                                         | LPNE                                                      | RT  | 0.7%<br>$\Delta R/R_0*100\%$        | 30   | × | 2017 | 62 |
| Pd NWs@ZIF-8_2 h (Pd nanowires)                                                                                         | LPNE                                                      | RT  | 0.3%<br>$\Delta R/R_0*100\%$        | 13   | × | 2017 | 62 |

|                                                                                |                                                              |     |                                            |                            |   |      |    |
|--------------------------------------------------------------------------------|--------------------------------------------------------------|-----|--------------------------------------------|----------------------------|---|------|----|
| SnO <sub>2</sub><br>(nanocrystalline<br>SnO <sub>2</sub> thin film)            | Sol-gel method                                               | RT  | 120%<br>$\Delta G/G_0 \times 100$          | 214                        | × | 2016 | 63 |
| Pd-WO <sub>3</sub> Nanoplates                                                  | Hydrothermal                                                 | 80  | 169.3<br>Ra/Rg                             | 42.8                       | × | 2015 | 64 |
| Pd/WO <sub>3</sub> Nanoplates                                                  | Solvothermal                                                 | RT  | 34<br>Ra/Rg                                | 24                         | × | 2014 | 65 |
| Pd/WO <sub>3</sub> Nanowires                                                   | Close-spaced<br>chemical vapor<br>deposition                 | 300 | 3.1<br>Ra/Rg                               | 75.6                       | × | 2013 | 66 |
| Pd/WO <sub>3</sub> Nanowires                                                   | Hydrothermal                                                 | 200 | 140±70%/ppm<br>$\Delta G/G_0 \times 100\%$ | —                          | × | 2013 | 67 |
| Pt/WO <sub>3</sub><br>Nanoparticles                                            | Flame spray<br>pyrolysis                                     | 150 | 2.58×10 <sup>3</sup><br>Ra/Rg              | within a<br>few<br>seconds | × | 2011 | 68 |
| WO <sub>3</sub> Nanodots                                                       | Electrochemical<br>anodising                                 | 150 | 103<br>Ra/Rg                               | ~240                       | × | 2010 | 69 |
| Pd/SnO <sub>2</sub> nanowires<br>(Pd-SnO <sub>2</sub> composite<br>nanofibers) | Electrospinning<br>technique and<br>calcination<br>procedure | 280 | ~25<br>Ra/Rg                               | ~9                         | × | 2010 | 70 |

**Supplementary Table 7** | Detailed configuration of experimental protocols. This table outlines the specific settings for the Standard (Full) and Concentration-Holdout evaluation scenarios. For each scenario, the table specifies the concentration levels used for training ("Seen") and those reserved exclusively for testing ("Unseen") to assess the model's robustness against distribution shifts. The "Random Seeds" column lists the specific initialization seeds used to generate the n=4 independent trials for each configuration, ensuring the reproducibility of the statistical results reported in Fig. 4.

| Scenario Group | Scenario Name    | Seen Concentrations (Training)                         | Unseen Concentrations (Test Only)             | Random Seeds |
|----------------|------------------|--------------------------------------------------------|-----------------------------------------------|--------------|
| 3-Holdout      | H300_600_900     | All available concentrations except 300, 600, 900      | 300, 600, 900 ppm                             | 56,63        |
| 3-Holdout      | H200_500_800     | All available concentrations except 200, 500, 800      | 200, 500, 800 ppm                             | 56, 63       |
| 4-Holdout      | H200_400_600_800 | All available concentrations except 200, 400, 600, 800 | 200, 400, 600, 800 ppm                        | 56 , 63      |
| 4-Holdout      | H300_500_700_900 | All available concentrations except 300, 500, 700, 900 | 300, 500, 700, 900 ppm                        | 56,63        |
| Full (Regular) | No Holdout       | All concentrations                                     | None (Test set follows training distribution) | 56,57,64,72  |

**Supplementary Table 8** | Relative humidity (RH) environments of saturated aqueous salts solutions.

| Saturated salt solution           | Relative humidity at room temperature | Solubility at 25 °C (~g/100 ml of water* <sup>1</sup> ) | Theoretical salt dosage (g) | Actual salt mass* <sup>2</sup> (g) | Deionized water volume (mL) |
|-----------------------------------|---------------------------------------|---------------------------------------------------------|-----------------------------|------------------------------------|-----------------------------|
| LiCl                              | 11% RH                                | 84.5                                                    | 253.5                       | 266.2                              | 300ml                       |
| MgCl <sub>2</sub>                 | 33% RH                                | 56.0                                                    | 168                         | 176.4                              |                             |
| Mg(NO <sub>3</sub> ) <sub>2</sub> | 53% RH                                | 71.2                                                    | 213.6                       | 224.3                              |                             |
| NaCl                              | 75% RH                                | 36.0                                                    | 108                         | 113.4                              |                             |
| K <sub>2</sub> SO <sub>4</sub>    | 97% RH                                | 12.0                                                    | 36                          | 37.8                               |                             |

\*<sup>1</sup> Although solubility is formally reported as grams of solute per 100 g of solvent, the density of deionized water at 25 °C is  $\approx 1.0 \text{ g mL}^{-1}$ ; accordingly,  $100 \text{ g} \approx 100 \text{ mL}$ , and we report the values as g/100 mL.

\*<sup>2</sup> The actual salt mass is set 5% higher than the stoichiometric mass for a saturated solution to ensure the system remains at saturation under minor ambient fluctuations.

**Supplementary Table 9** | Detailed hyperparameters of the adapted Patch-Transformer model and training protocol.

| Category           | Hyperparameter                | Value / Description                         |
|--------------------|-------------------------------|---------------------------------------------|
| Data Processing    | Sampling Frequency            | 15 Hz                                       |
|                    | Input Window Size             | 0.6 s (9 data points)                       |
|                    | Training Window Stride        | 0.33 s (5 data points)                      |
|                    | Evaluation Window Stride      | 0.6 s (9 data points, non-overlapping)      |
|                    | Label Normalization           | Scaled to (divided by 1000 ppm)             |
| Patch Embedding    | Patch Length                  | 3 points (0.2 s)                            |
|                    | Patch Stride                  | points (Non-overlapping)                    |
|                    | Number of Patches             | 3                                           |
| Model Architecture | Embedding Dimension           | 128                                         |
|                    | Number of Encoder Layers      | 4                                           |
|                    | Number of Attention Heads     | 4                                           |
|                    | Head Dimension                | 32                                          |
|                    | Feed-Forward Expansion Factor | 4                                           |
|                    | Activation Function           | GeLU                                        |
|                    | Normalization                 | LayerNorm (Pre-Norm configuration)          |
|                    | Dropout Rate                  | 0.2                                         |
| Training Protocol  | Positional Encoding           | Learnable (Trainable Parameter)             |
|                    | Framework                     | PyTorch (on NVIDIA RTX 4090)                |
|                    | Parameter Count               | ~0.79 Million                               |
|                    | Seed                          | 56                                          |
|                    | Optimizer                     | AdamW                                       |
|                    | Initial Learning Rate         | $1 \times 10^{-3}$                          |
|                    | Batch Size                    | 64                                          |
|                    | Loss Function                 | Mean Absolute Error (L1 Loss)               |
|                    | Total Epochs                  | 100                                         |
|                    | Learning Rate Scheduler       | ReduceLRonPlateau (Factor=0.5, Patience=10) |
|                    | Early Stopping / Selection    | Best checkpoint based on Validation Loss    |

**Supplementary Table 10** Summarizes a hyper-parameter ablation over patch granularity and model capacity (embedding dimension  $D$ , number of layers  $L$ ) for our patch-based transformer regressor under the 0.6 s input setting. All variants are trained/evaluated under the same split and optimization settings, and we report test  $R^2$  ( $\uparrow$ ) and MAE ( $\downarrow$ ). With a fixed backbone ( $D=128$ ,  $L=4$ ), point-wise patching ( $P=1$ ) leads to a clear performance drop compared to moderate patching ( $P=3$ ), indicating that local aggregation within short windows is important for this regression task. For  $P=3$ , scaling the backbone to a smaller model ( $D=64$ ,  $L=2$ ) slightly increases MAE, while a larger model ( $D=256$ ,  $L=6$ ) substantially increases parameters without meaningful gains. Therefore, we choose  $P=3$ ,  $D=128$ ,  $L=4$  as the baseline, balancing accuracy and model complexity.

| Variant     | Key Settings (P, D, L) | Parameter Count | $R^2$ ( $\uparrow$ ) | MAE ( $\downarrow$ ) |
|-------------|------------------------|-----------------|----------------------|----------------------|
| Baseline    | (3, 128, 4)            | 793 K           | 0.9824               | 25.99                |
| Patch -1    | (1, 128, 4)            | 794 K           | 0.8576               | 58.56                |
| Tiny model  | (3, 64, 2)             | 100 K           | 0.9808               | 27.15                |
| Large model | (3, 256, 6)            | 4.74 M          | 0.9824               | 26.14                |

**Supplementary Table 11** | List of cultivation conditions for hydrogen-producing bacteria.

| Condition | Cultivation temperature (°C) | Sheep blood | Inoculum dilution |
|-----------|------------------------------|-------------|-------------------|
| Cond.1    | 20                           | ✓           | 1:100             |
| Cond.2    | 37                           | ×           | 1:100             |
| Cond.3    | 37                           | ✓           | 1:100             |
| Cond.4    | 37                           | ✓           | 1:500             |

## Supplementary Video.

Demonstration of a hydrogen leak detection system under actual hydrogen leak conditions.

## References

1. Oulhakem, O. et al. Effect of water intercalation into tungsten trioxide structure ( $\text{WO}_3 \cdot x\text{H}_2\text{O}$ )( $x=0, 1, 2$ ): correlation between structure and photocatalytic performances. *J. Catal.* **427**, 115109 (2023).
2. Abedzadeh, M., Ranjbar, M. & Kameli, P. Fabrication of Pd-decorated tungsten oxide nanoflakes for hydrogen sensors via facile anodizing oxidation method. *Int. J. Hydrogen Energy* **50**, 1325-1334 (2024).
3. Wu, J. et al. Ultrafast response and recovery in advanced  $\text{H}_2$  sensing: Self-assembled fruit-leaf-like PdO/ $\text{WO}_3$  nanostructures. *Sens. Actuators B: Chem.* **430**, 137339 (2025).
4. Wang, X. et al. Design of ultrahigh-response gas sensor based on Pd- $\text{WO}_3/\text{WS}_2$  ternary nanocomposites for ultrafast hydrogen detection. *Sens. Actuators B: Chem.* **401**, 134991 (2024).
5. Li, J. et al. Essential role of lattice oxygen in hydrogen sensing reaction. *Nat. Commun.* **15**, 2998 (2024).
6. Ahmad, N. et al. Recent Advances on the Gas-Sensing Properties and Mechanism of Perovskite Oxide Materials-A Review. *ACS omega* **10**, 13780-13796 (2025).
7. Chang, C. et al. Study of a  $\text{WO}_3$  thin film based hydrogen gas sensor decorated with platinum nanoparticles. *Sens. Actuators B: Chem.* **317**, 128145 (2020).
8. Degler, D., Weimar, U. & Barsan, N. Current understanding of the fundamental mechanisms of doped and loaded semiconducting metal-oxide-based gas sensing materials. *ACS Sens.* **4**, 2228-2249 (2019).
9. Wang, Z. et al. Sensitization of Pd loading for remarkably enhanced hydrogen sensing performance of 3DOM  $\text{WO}_3$ . *Sens. Actuators B: Chem.* **262**, 577-587 (2018).
10. Ding, W. et al. Oxygen defects in nanostructured metal-oxide gas sensors: recent advances and challenges. *Chin. J. Chem.* **38**, 1832-1846 (2020).
11. Cai, L. et al. Highly sensitive  $\text{H}_2$  sensor based on PdO-decorated  $\text{WO}_3$  nanospindle pn heterostructure. *Int. J. Hydrogen Energy* **45**, 31327-31340 (2020).
12. Watanabe, T. et al. A fiber-optic hydrogen gas sensor with low propagation loss. *Sens. Actuators B: Chem.* **145**, 781-787 (2010).
13. Han, S.-I. et al. Effect of structural changes of Pd/ $\text{WO}_3$  thin films on response direction and rate in hydrogen detection. *Sens. Actuators B: Chem.* **404**, 135259 (2024).
14. Pehlivan, E., Granqvist, C. G. & Niklasson, G. A. Impedance spectroscopy of electrochromic hydrous tungsten oxide films. *Electron. Mater.* **2**, 312-323 (2021).
15. Zhang, D. et al. Diversiform metal oxide-based hybrid nanostructures for gas sensing with versatile prospects. *Coord. Chem. Rev.* **413**, 213272 (2020).
16. Guo, M. et al. Fast-response MEMS xylene gas sensor based on CuO/ $\text{WO}_3$  hierarchical structure. *J. Hazard. Mater.* **429**, 127471 (2022).

17. Xu, X. et al. High-Performance Hydrogen Sensors for ppb-Level Detection at Room Temperature Using Pd Nanoparticle-Coated Si Nanoforest. *ACS Sens.* **10**, 5781-5790 (2025).
18. Huang, T. et al. Ultrafast (0.3 s) integrated hydrogen leakage sensor system empowered by concentration prediction algorithm. *Chem. Eng. J.*, 166395 (2025).
19. Zhu, L. et al. In Situ Synthesis of Ordered Macroporous Metal Oxides Monolayer on MEMS Chips: Toward Gas Sensor Arrays for Artificial Olfactory. *Small* **21**, e03267 (2025).
20. Yang, R. et al. Ultrafast Hydrogen Detection System Using Vertical Thermal Conduction Structure and Neural Network Prediction Algorithm Based on Sensor Response Process. *ACS Sens.* **10**, 2181-2190 (2025).
21. Chen, K. et al. Active Polymer-Templated Porous Metal Oxide Nanospheres with Tailored Single-Atom Modification for Olfactory Intelligence. *J. Am. Chem. Soc.* **147**, 47616-47626 (2025).
22. Hu, Q. et al. Nanotransistor-based gas sensing with record-high sensitivity enabled by electron trapping effect in nanoparticles. *Nat. Commun.* **15**, 5259 (2024).
23. Nam, G. B. et al. Real-time tunable gas sensing platform based on SnO<sub>2</sub> nanoparticles activated by blue micro-light-emitting diodes. *Nano-Micro Lett.* **16**, 261 (2024).
24. Luo, W., Li, J. & Li, M. MEMS Gas Sensors Based on In<sub>2</sub>O<sub>3</sub>-Decorated SnO<sub>2</sub> Nanosheets for Aniline Detection. *IEEE Sens. J.* **24**, 29669-29677 (2024).
25. Zhang, Z. et al. Wafer-level manufacturing of MEMS H<sub>2</sub> sensing chips based on Pd nanoparticles modified SnO<sub>2</sub> film patterns. *Adv. Sci.* **10**, 2302614 (2023).
26. Al-Diabat, A. M. et al. Improved Hydrogen Gas sensing performance of Carbon Nanotube Synthesized using microwave oven. *IEEE Sens. J.* **23**, 1033-1041 (2022).
27. Sun, Y. & Zhang, Y. Wafer-scale floating-gate field effect transistor sensor built on carbon nanotubes film for Ppb-level NO<sub>2</sub> detection. *Chem. Eng. J.* **473**, 145480 (2023).
28. Zhan, S. et al. Wafer-scale field-effect transistor-type sensor using a carbon nanotube film as a channel for ppb-level hydrogen sulfide detection. *ACS Sens.* **8**, 3060-3067 (2023).
29. Xue, F. et al. A low power four-channel metal oxide semiconductor gas sensor array with T-shaped structure. *J. Microelectromech. Syst.* **31**, 275-282 (2022).
30. Yang, G. G. et al. Multilevel Self-assembly of block copolymers and polymer colloids for a transparent and sensitive gas sensor platform. *ACS nano* **16**, 18767-18776 (2022).
31. Li, M. et al. Wafer-level patterning of SnO nanosheets for MEMS gas sensors. *IEEE Electron Device Lett.* **43**, 1981-1984 (2022).
32. Nasir, T. et al. Wafer-scale growth of 3D graphene on SiO<sub>2</sub> by remote metal catalyst-assisted MOCVD and its application as a NO<sub>2</sub> gas sensor. *Crystal Growth Design* **22**, 4192-4202 (2022).
33. Liu, F. et al. Toward practical gas sensing with rapid recovery semiconducting carbon nanotube film sensors. *Sci. China Inf. Sci.* **65**, 162402 (2022).
34. Yu, H. et al. Capacitive sensor based on GaN honeycomb nanonetwork for ultrafast and low temperature hydrogen gas detection. *Sens. Actuators B: Chem.* **346**, 130488 (2021).
35. Lee, K. et al. Direct integration of carbon nanotubes on a suspended Pt microheater for hydrogen gas sensing. *J. Mater. Sci.: Mater. Electron.* **32**, 19626-19634 (2021).
36. Lee, D. et al. Advanced recovery and high-sensitive properties of memristor-based gas sensor devices operated at room temperature. *ACS Sens.* **6**, 4217-4224 (2021).

37. Kim, Y. et al. Tailored Graphene Micropatterns by Wafer-Scale Direct Transfer for Flexible Chemical Sensor Platform. *Adv. Mater.* **33**, 2004827 (2021).
38. Shin, W. et al. Low frequency noise characteristics of resistor-and Si MOSFET-type gas sensors fabricated on the same Si wafer with In<sub>2</sub>O<sub>3</sub> sensing layer. *Sens. Actuators B: Chem.* **318**, 128087 (2020).
39. Liu, L. et al. “Top-down” and “bottom-up” strategies for wafer-scaled miniaturized gas sensors design and fabrication. *Microsyst. Nanoeng.* **6**, 31 (2020).
40. Wei, Z. et al. Ultra-thin sub-10 nm Ga<sub>2</sub>O<sub>3</sub>-WO<sub>3</sub> heterostructures developed by atomic layer deposition for sensitive and selective C<sub>2</sub>H<sub>5</sub>OH detection on ppm level. *Sens. Actuators B: Chem.* **287**, 147-156 (2019).
41. Mandal, S. et al. A robust organic hydrogen sensor for distributed monitoring applications. *Nat. Electron.*, 1-10 (2025).
42. Tang, M. et al. Enhanced H<sub>2</sub> gas sensing performances by Pd-loaded In<sub>2</sub>O<sub>3</sub> microspheres. *Appl. Phys. A* **130**, 741 (2024).
43. Chen, Z. et al. Balancing Pd–H Interactions: Thiolate-Protected Palladium Nanoclusters for Robust and Rapid Hydrogen Gas Sensing. *Adv. Mater.* **36**, 2404291 (2024).
44. Mobtakeri, S. et al. Effect of growth pressure on sulfur content of RF-magnetron sputtered WS<sub>2</sub> films and thermal oxidation properties of them toward using Pd decorated WO<sub>3</sub> based H<sub>2</sub> gas sensor. *Sens. Actuators B: Chem.* **381**, 133485 (2023).
45. Güldüren, M. E. et al. Investigating the influence of Ni doping on the CuO thin films deposited via ultrasonic spray pyrolysis: structural, optical and H<sub>2</sub> gas sensing analyses. *Int. J. Hydrogen Energy* **48**, 828-839 (2023).
46. Munusami, V. et al. High sensitivity LPG and H<sub>2</sub> gas sensing behavior of MoS<sub>2</sub>/graphene hybrid sensors prepared by facile hydrothermal method. *Ceram. Int.* **48**, 29322-29331 (2022).
47. Mobtakeri, S., Habashyani, S. & Gür, E. Highly responsive Pd-decorated MoO<sub>3</sub> nanowall H<sub>2</sub> gas sensors obtained from in-situ-controlled thermal oxidation of sputtered MoS<sub>2</sub> films. *ACS Appl. Mater. Interfaces* **14**, 25741-25752 (2022).
48. Liu, B. et al. Fabrication of Pd-loaded  $\alpha$ -Fe<sub>2</sub>O<sub>3</sub> decorated rGO hybrids for highly sensitive H<sub>2</sub> sensing. *Appl. Surf. Sci.* **579**, 152220 (2022).
49. Yang, P. et al. Fast, Sensitive, and highly selective room-temperature hydrogen sensing of defect-rich orthorhombic Nb<sub>2</sub>O<sub>5-x</sub> nanobelts with an abnormal p-type sensor response. *ACS Appl. Mater. Interfaces* **14**, 25937-25948 (2022).
50. Kabitakis, V. et al. A Low-Power CuSCN Hydrogen Sensor Operating Reversibly at Room Temperature. *Adv. Funct. Mater.* **32**, 2102635 (2022).
51. Li, Q. et al. Controllable fabrication of PdO-PdAu Ternary hollow shells: synergistic acceleration of H<sub>2</sub>-sensing speed via morphology regulation and electronic structure modulation. *Small* **18**, 2106874 (2022).
52. Kumaresan, M. et al. TiO<sub>2</sub> nanofibers decorated with monodispersed WO<sub>3</sub> heterostructure sensors for high gas sensing performance towards H<sub>2</sub> gas. *Inorg. Chem. Commun.* **129**, 108663 (2021).
53. Al-Hazeem, N. Z. et al. Hydrogen gas sensor based on nanofibers TiO<sub>2</sub>-PVP thin film at room temperature prepared by electrospinning. *Microsyst. Technol.* **27**, 293-299 (2021).
54. Song, Z. et al. Wireless self-powered high-performance integrated nanostructured-gas-

- sensor network for future smart homes. *ACS nano* **15**, 7659-7667 (2021).
55. Zhong, A. et al. Ultrafast H<sub>2</sub> gas nanosensor for ppb-level H<sub>2</sub> gas detection based on GaN honeycomb nanonetwork. *Sens. Actuators B: Chem.* **329**, 129079 (2021).
  56. Punetha, D., Kar, M. & Pandey, S. K. A new type low-cost, flexible and wearable tertiary nanocomposite sensor for room temperature hydrogen gas sensing. *Sci. Rep.* **10**, 2151 (2020).
  57. Han, Z. et al. Multilayer porous Pd-WO<sub>3</sub> composite thin films prepared by sol-gel process for hydrogen sensing. *Int. J. Hydrogen Energy* **45**, 7223-7233 (2020).
  58. Kim, D.-H. et al. High-resolution, fast, and shape-conformable hydrogen sensor platform: polymer nanofiber yarn coupled with nanograined Pd@Pt. *ACS nano* **13**, 6071-6082 (2019).
  59. Xue, N. et al. Highly sensitive and selective hydrogen gas sensor using the mesoporous SnO<sub>2</sub> modified layers. *Sensors* **17**, 2351 (2017).
  60. Li, Y. et al. Pd nanoparticles composited SnO<sub>2</sub> microspheres as sensing materials for gas sensors with enhanced hydrogen response performances. *J. Alloys Compd.* **710**, 216-224 (2017).
  61. Zhang, Z. et al. H<sub>2</sub> response characteristics for sol-gel-derived WO<sub>3</sub>-SnO<sub>2</sub> dual-layer thin films. *Ceram. Int.* **43**, 6693-6699 (2017).
  62. Koo, W.-T. et al. Accelerating palladium nanowire H<sub>2</sub> sensors using engineered nanofiltration. *ACS nano* **11**, 9276-9285 (2017).
  63. Kadhim, I. H., Hassan, H. A. & Abdullah, Q. Hydrogen gas sensor based on nanocrystalline SnO<sub>2</sub> thin film grown on bare Si substrates. *Nano-Micro Lett.* **8**, 20-28 (2016).
  64. Wang, Y. et al. High performance and negative temperature coefficient of low temperature hydrogen gas sensors using palladium decorated tungsten oxide. *J. Mater. Chem. A* **3**, 1317-1324 (2015).
  65. Liu, B. et al. Improved room-temperature hydrogen sensing performance of directly formed Pd/WO<sub>3</sub> nanocomposite. *Sens. Actuators B: Chem.* **193**, 28-34 (2014).
  66. Chávez, F. et al. Sensing performance of palladium-functionalized WO<sub>3</sub> nanowires by a drop-casting method. *Appl. Surf. Sci.* **275**, 28-35 (2013).
  67. Kukkola, J. et al. Room temperature hydrogen sensors based on metal decorated WO<sub>3</sub> nanowires. *Sens. Actuators B: Chem.* **186**, 90-95 (2013).
  68. Samerjai, T. et al. Selectivity towards H<sub>2</sub> gas by flame-made Pt-loaded WO<sub>3</sub> sensing films. *Sens. Actuators B: Chem.* **157**, 290-297 (2011).
  69. Calavia, R. et al. Fabrication of WO<sub>3</sub> nanodot-based microsensors highly sensitive to hydrogen. *Sens. Actuators B: Chem.* **149**, 352-361 (2010).
  70. Zhang, H. et al. Enhancement of hydrogen monitoring properties based on Pd-SnO<sub>2</sub> composite nanofibers. *Sens. Actuators B: Chem.* **147**, 111-115 (2010).
